# Supplementary material for: Time-dependent changes in monocyte subsets and gene expression patterns are associated with long-term recovery in patients with ischemic stroke
Source: Research Square preprint supplement (doi:10.21203/rs.3.rs-8980124/v1), 2026-03-16
Supplement: Supplementary file 1 [file 0c3599ac5f650fd0e1f1c48f.pdf]

### **NIHSS of patients (FACS) - Recovery vs No recovery**

|                    | <b>Below threshold ?</b> | <b>P value</b> | <b>Mean of Lack of recovery</b> | <b>Mean of Spontaneous recovery</b> | <b>Difference</b> | <b>SE of difference</b> | <b>t ratio</b> | <b>df</b> |
|--------------------|--------------------------|----------------|---------------------------------|-------------------------------------|-------------------|-------------------------|----------------|-----------|
| <b>24 hours</b>    | No                       | 0.882994       | 6.105                           | 6.389                               | -0.2836           | 1.913                   | 0.1483         | 35.00     |
| <b>3-5 days</b>    | Yes                      | 0.013532       | 4.471                           | 1.833                               | 2.637             | 1.011                   | 2.609          | 33.00     |
| <b>3 months</b>    | No                       | 0.072941       | 4.167                           | 1.235                               | 2.931             | 1.571                   | 1.866          | 27.00     |
| <b>&gt; 1 year</b> | Yes                      | 0.006876       | 4.167                           | 0.3750                              | 3.792             | 1.292                   | 2.936          | 26.00     |

### **NIHSS of patients (Fluidigm) - Recovery vs No recovery**

|                    | <b>Below threshold ?</b> | <b>P value</b> | <b>Mean of Lack of recovery</b> | <b>Mean of Spontaneous recovery</b> | <b>Difference</b> | <b>SE of difference</b> | <b>t ratio</b> | <b>df</b> |
|--------------------|--------------------------|----------------|---------------------------------|-------------------------------------|-------------------|-------------------------|----------------|-----------|
| <b>24 hours</b>    | No                       | 0.657133       | 5.500                           | 4.714                               | 0.7857            | 1.735                   | 0.4529         | 15.00     |
| <b>3-5 days</b>    | No                       | 0.245107       | 4.300                           | 2.429                               | 1.871             | 1.547                   | 1.210          | 15.00     |
| <b>3 months</b>    | No                       | 0.602566       | 1.875                           | 1.333                               | 0.5417            | 1.013                   | 0.5348         | 12.00     |
| <b>&gt; 1 year</b> | Yes                      | 0.037239       | 2.429                           | 0.6000                              | 1.829             | 0.7615                  | 2.401          | 10.00     |

Patients showing a decrease of 1 or more NIHSS points from baseline to the chronic phase (3 months and/or 1 year) were categorized as exhibiting neurological improvement (Recovery), whereas those with unchanged or increased NIHSS were categorized as having no neurological improvement (No Recovery).
