# Supplementary material for: Time-dependent changes in monocyte subsets and gene expression patterns are associated with long-term recovery in patients with ischemic stroke
Source: Research Square preprint supplement (doi:10.21203/rs.3.rs-8980124/v1), 2026-03-16
Supplement: Supplementary file 2 [file 39cf456666cead7bf0673c95.pdf]

## Row statistics of age distribution - Control vs Patients

| Flow cytometry  | Control subjects |       |    | Patients |       |    |
|-----------------|------------------|-------|----|----------|-------|----|
|                 | Mean             | SD    | N  | Mean     | SD    | N  |
| All             | 67,76            | 14,79 | 37 | 69,51    | 12,16 | 37 |
| Male            | 64,68            | 15,25 | 25 | 67,84    | 13,43 | 25 |
| Female          | 74,17            | 11,92 | 12 | 73,00    | 8,39  | 12 |
| Minor stroke    | 65,85            | 16,77 | 20 | 68,32    | 13,94 | 19 |
| Moderate stroke | 69,56            | 11,96 | 18 | 70,78    | 10,19 | 18 |
| Recovery        | 60,44            | 15,15 | 18 | 66,56    | 13,50 | 18 |
| No recovery     | 74,68            | 10,79 | 19 | 72,32    | 10,32 | 19 |

| Gene expression analysis | Control subjects |       |    | Patients |       |    |
|--------------------------|------------------|-------|----|----------|-------|----|
|                          | Mean             | SD    | N  | Mean     | SD    | N  |
| All                      | 69,40            | 10,81 | 15 | 70,07    | 10,73 | 15 |
| Male                     | 69,67            | 12,05 | 9  | 71,00    | 12,82 | 9  |
| Female                   | 69,00            | 9,72  | 6  | 68,67    | 7,47  | 6  |
| Minor stroke             | 65,17            | 10,46 | 6  | 69,00    | 10,35 | 6  |
| Moderate stroke          | 67,11            | 11,42 | 9  | 69,22    | 10,26 | 9  |
| Recovery                 | 66,00            | 12,15 | 7  | 70,14    | 12,73 | 7  |
| No recovery              | 66,63            | 10,11 | 8  | 70,00    | 9,56  | 8  |

Patients showing a decrease of 1 or more NIHSS points from baseline to the chronic phase (3 months and/or 1 year) were categorized as exhibiting neurological improvement (Recovery), whereas those with unchanged or increased NIHSS were categorized as having no neurological improvement (No Recovery).

Minor stroke = NIHSS 1-5 and Moderate stroke = NIHSS, 6-20
