# Supplementary material for: Time-dependent changes in monocyte subsets and gene expression patterns are associated with long-term recovery in patients with ischemic stroke
Source: Research Square preprint supplement (doi:10.21203/rs.3.rs-8980124/v1), 2026-03-16
Supplement: Supplementary file 3 [file 57bde7d839fb1f6b95d2d9ff.pdf]

## Temporal changes in monocyte subtype ratio after stroke

| All                     |  | P-Value | P-Value<br>(24 h) | P-Value<br>(3-5 d) | P-Value<br>(1 mo) | P-Value<br>(3 mo) |
|-------------------------|--|---------|-------------------|--------------------|-------------------|-------------------|
| Monocytes               |  | 0,003   | 0,031             | 0,003              | 0,103             | 0,245             |
| Classical monocytes     |  | 0,041   | 0,149             | 0,731              | 0,211             | 0,041             |
| Intermediate monocytes  |  | 0,006   | 0,669             | 0,006              | 0,471             | 0,323             |
| Non-classical monocytes |  | 0,052   | 0,513             | 0,052              | 0,240             | 0,087             |

  

| Male vs female          |        | P-Value | P-Value<br>(24 h) | P-Value<br>(3-5 d) | P-Value<br>(1 mo) | P-Value<br>(3 mo) |
|-------------------------|--------|---------|-------------------|--------------------|-------------------|-------------------|
| Monocytes               | Male   | 0,001   | 0,045             | 0,001              | 0,458             | 0,285             |
| Classical monocytes     | Male   | 0,038   | 0,048             | 0,660              | 0,089             | 0,038             |
| Intermediate monocytes  | Male   | 0,007   | 0,432             | 0,007              | 0,648             | 0,783             |
| Non-classical monocytes | Male   | 0,057   | 0,260             | 0,447              | 0,100             | 0,057             |
| Monocytes               | Female | 0,103   | 0,435             | 0,579              | 0,103             | 0,699             |
| Classical monocytes     | Female | 0,288   | 0,773             | 0,288              | 0,902             | 0,473             |
| Intermediate monocytes  | Female | 0,177   | 0,729             | 0,325              | 0,608             | 0,177             |
| Non-classical monocytes | Female | 0,023   | 0,773             | 0,023              | 0,695             | 0,792             |

  

| Male vs female          | Recovery    | P-Value | P-Value<br>(24 h) | P-Value<br>(3-5 d) | P-Value<br>(1 mo) | P-Value<br>(3 mo) |
|-------------------------|-------------|---------|-------------------|--------------------|-------------------|-------------------|
| Monocytes               | Spontaneous | 0,008   | 0,022             | 0,008              | 0,175             | 0,023             |
| Classical monocytes     | Spontaneous | 0,017   | 0,017             | 0,382              | 0,153             | 0,184             |
| Intermediate monocytes  | Spontaneous | 0,010   | 0,384             | 0,010              | 0,343             | 0,184             |
| Non-classical monocytes | Spontaneous | 0,090   | 0,090             | 0,947              | 0,219             | 0,313             |
| Monocytes               | Lack of     | 0,101   | 0,549             | 0,101              | 0,436             | 1,000             |
| Classical monocytes     | Lack of     | 0,035   | 0,748             | 0,086              | 0,631             | 0,035             |
| Intermediate monocytes  | Lack of     | 0,254   | 0,815             | 0,254              | 1,000             | 0,954             |
| Non-classical monocytes | Lack of     | 0,009   | 0,448             | 0,009              | 0,753             | 0,099             |

Patients showing a decrease of 1 or more NIHSS points from baseline to the chronic phase (3 months and/or 1 year) were categorized as exhibiting neurological improvement (Recovery), whereas those with unchanged or increased NIHSS were categorized as having no neurological improvement (No Recovery).
