# Supplementary material for: Time-dependent changes in monocyte subsets and gene expression patterns are associated with long-term recovery in patients with ischemic stroke
Source: Research Square preprint supplement (doi:10.21203/rs.3.rs-8980124/v1), 2026-03-16
Supplement: Supplementary file 4 [file 69b9856701b9acb90736a406.pdf]

**Linear regression analysis (Pearson) for gene expression with ratio of recovery**

| Gene     | Function                                   | Subpopulation | Time after stroke | N  | p-value | Correlation coefficient (r) | Correlation coefficient 95% confidence interval |        | Regression coefficient | Regression coefficient 95% confidence interval |         | Intercept |
|----------|--------------------------------------------|---------------|-------------------|----|---------|-----------------------------|-------------------------------------------------|--------|------------------------|------------------------------------------------|---------|-----------|
| ACTB     | Housekeeping                               | all           | 24 h              | 13 | 0,076   | -0,509                      | -0,828                                          | 0,058  | -1,5410                | -3,2701                                        | 0,1881  | 0,9558    |
| ANXA1    | Anti-inflammatory                          | all           | 24 h              | 13 | 0,249   | -0,345                      | -0,753                                          | 0,255  | -1,2355                | -3,4689                                        | 0,9978  | 1,0653    |
| B2M      | Housekeeping                               | all           | 24 h              | 13 | 0,092   | -0,486                      | -0,818                                          | 0,088  | -0,9315                | -2,0416                                        | 0,1787  | 0,5311    |
| BDNF     | Neuroplasticity                            | all           | 24 h              | 13 | 0,959   | 0,016                       | -0,540                                          | 0,562  | 0,0223                 | -0,9175                                        | 0,9621  | -0,0744   |
| CCR2     | Monocyte infiltration                      | all           | 24 h              | 13 | 0,351   | -0,282                      | -0,721                                          | 0,318  | -0,5119                | -1,6675                                        | 0,6437  | 0,6881    |
| CD11B    | Monocyte adhesion and migration            | all           | 24 h              | 13 | 0,216   | -0,368                      | -0,764                                          | 0,230  | -0,4749                | -1,2716                                        | 0,3218  | 0,9271    |
| CD11C    | Monocyte adhesion                          | all           | 24 h              | 13 | 0,033   | -0,592                      | -0,862                                          | -0,061 | -1,7909                | -3,4097                                        | -0,1721 | 1,0004    |
| CD169    | Pro-inflammatory                           | all           | 24 h              | 13 | 0,353   | 0,281                       | -0,320                                          | 0,720  | 0,4861                 | -0,6166                                        | 1,5888  | -0,1168   |
| CD31     | Anti-inflammatory                          | all           | 24 h              | 13 | 0,067   | -0,522                      | -0,833                                          | 0,040  | -0,8640                | -1,7998                                        | 0,0718  | 0,4056    |
| CD32     | Immune modulator                           | all           | 24 h              | 13 | 0,037   | -0,581                      | -0,857                                          | -0,044 | -1,8083                | -3,4910                                        | -0,1256 | 1,2314    |
| CD33     | Anti-inflammatory                          | all           | 24 h              | 13 | 0,094   | 0,484                       | -0,091                                          | 0,817  | 1,2087                 | -0,2415                                        | 2,6589  | -0,5677   |
| CD36     | Pro-inflammatory                           | all           | 24 h              | 13 | 0,161   | 0,413                       | -0,179                                          | 0,785  | 0,5758                 | -0,2666                                        | 1,4182  | 0,2447    |
| CD38     | Immune modulator                           | all           | 24 h              | 13 | 0,318   | 0,300                       | -0,300                                          | 0,731  | 0,7933                 | -0,8777                                        | 2,4643  | -0,7981   |
| CD40     | Pro-inflammatory                           | all           | 24 h              | 13 | 0,484   | 0,213                       | -0,383                                          | 0,684  | 0,9611                 | -1,9629                                        | 3,8852  | -1,5989   |
| CD64     | Pro-inflammatory                           | all           | 24 h              | 13 | 0,758   | -0,095                      | -0,614                                          | 0,481  | -0,2155                | -1,7162                                        | 1,2853  | 0,2068    |
| CD86     | Pro-inflammatory                           | all           | 24 h              | 13 | 0,286   | 0,320                       | -0,280                                          | 0,740  | 0,5828                 | -0,5618                                        | 1,7274  | -0,7263   |
| CD91     | Immune modulator                           | all           | 24 h              | 13 | 0,041   | 0,573                       | 0,032                                           | 0,854  | 1,1945                 | 0,0607                                         | 2,3282  | -0,6466   |
| CX3CR1   | Anti-inflammatory                          | all           | 24 h              | 13 | 0,280   | -0,324                      | -0,742                                          | 0,276  | -0,6972                | -2,0478                                        | 0,6534  | 0,1660    |
| GAPDH    | Housekeeping                               | all           | 24 h              | 13 | 0,300   | -0,312                      | -0,736                                          | 0,289  | -1,0360                | -3,1302                                        | 1,0583  | 0,4284    |
| IFITM2   | interferon response and antiviral immunity | all           | 24 h              | 13 | 0,145   | -0,427                      | -0,792                                          | 0,162  | -1,1615                | -2,7922                                        | 0,4693  | 0,6289    |
| IL10     | Anti-inflammatory                          | all           | 24 h              | 13 | 0,493   | -0,209                      | -0,682                                          | 0,386  | -0,8064                | -3,3091                                        | 1,6963  | 0,7929    |
| IL1B     | Pro-inflammatory                           | all           | 24 h              | 13 | 0,959   | -0,016                      | -0,562                                          | 0,540  | -0,0351                | -1,4980                                        | 1,4278  | 0,1578    |
| MARCO    | Phagocytotic activity, scavenger receptor  | all           | 24 h              | 13 | 0,284   | -0,321                      | -0,741                                          | 0,279  | -1,2142                | -3,5877                                        | 1,1593  | 0,7611    |
| SIGLEC10 | Anti-inflammatory                          | all           | 24 h              | 13 | 0,358   | -0,278                      | -0,719                                          | 0,323  | -0,9942                | -3,2761                                        | 1,2877  | 0,1061    |
| SLC24A4  | cellular calcium ion homeostasis           | all           | 24 h              | 13 | 0,131   | 0,442                       | -0,144                                          | 0,798  | 0,6776                 | -0,2355                                        | 1,5906  | -0,4269   |
| STAT6    | Anti-inflammatory                          | all           | 24 h              | 13 | 0,751   | -0,098                      | -0,616                                          | 0,479  | -0,1508                | -1,1699                                        | 0,8682  | -0,1107   |
| TGFB1    | Anti-inflammatory, immune modulator        | all           | 24 h              | 13 | 0,016   | -0,649                      | -0,884                                          | -0,153 | -1,3284                | -2,3617                                        | -0,2952 | 0,8423    |
| TGM2     | Immune modulator                           | all           | 24 h              | 13 | 0,983   | 0,007                       | -0,546                                          | 0,556  | 0,0248                 | -2,4300                                        | 2,4797  | -0,6908   |
| TLR8     | Pro-inflammatory                           | all           | 24 h              | 13 | 0,389   | -0,261                      | -0,710                                          | 0,338  | -1,0040                | -3,4657                                        | 1,4577  | 0,1255    |
| TNFA     | Pro-inflammatory                           | all           | 24 h              | 13 | 0,755   | -0,096                      | -0,614                                          | 0,480  | -0,3705                | -2,9219                                        | 2,1809  | -0,3368   |
| TREM1    | Pro-inflammatory                           | all           | 24 h              | 13 | 0,342   | -0,287                      | -0,724                                          | 0,314  | -0,3008                | -0,9671                                        | 0,3654  | 0,8928    |
| TSPO     | Anti-inflammatory                          | all           | 24 h              | 13 | 0,275   | 0,327                       | -0,273                                          | 0,744  | 0,4445                 | -0,4080                                        | 1,2971  | 0,1602    |
| ACTB     | Housekeeping                               | classical     | 24 h              | 13 | 0,384   | -0,264                      | -0,711                                          | 0,336  | -0,3980                | -1,3644                                        | 0,5684  | 0,1772    |
| ANXA1    | Anti-inflammatory                          | classical     | 24 h              | 13 | 0,418   | -0,246                      | -0,702                                          | 0,353  | -1,0061                | -3,6406                                        | 1,6284  | 0,8636    |
| B2M      | Housekeeping                               | classical     | 24 h              | 13 | 0,216   | -0,368                      | -0,764                                          | 0,229  | -0,3501                | -0,9366                                        | 0,2364  | 0,1239    |
| BDNF     | Neuroplasticity                            | classical     | 24 h              | 13 | 0,189   | 0,389                       | -0,206                                          | 0,774  | 0,6000                 | -0,3431                                        | 1,5431  | -0,3944   |
| CCR2     | Monocyte infiltration                      | classical     | 24 h              | 13 | 0,408   | -0,251                      | -0,705                                          | 0,348  | -0,4384                | -1,5610                                        | 0,6841  | 0,7220    |
| CD11B    | Monocyte adhesion and migration            | classical     | 24 h              | 13 | 0,316   | -0,302                      | -0,731                                          | 0,299  | -0,4777                | -1,4793                                        | 0,5239  | 0,6228    |
| CD11C    | Monocyte adhesion                          | classical     | 24 h              | 13 | 0,028   | -0,607                      | -0,868                                          | -0,085 | -0,9903                | -1,8501                                        | -0,1305 | 0,1972    |
| CD169    | Pro-inflammatory                           | classical     | 24 h              | 13 | 0,541   | 0,187                       | -0,406                                          | 0,669  | 0,3838                 | -0,9550                                        | 1,7225  | 0,0218    |
| CD31     | Anti-inflammatory                          | classical     | 24 h              | 13 | 0,326   | -0,296                      | -0,728                                          | 0,304  | -0,2542                | -0,7981                                        | 0,2898  | -0,1974   |
| CD32     | Immune modulator                           | classical     | 24 h              | 13 | 0,053   | -0,547                      | -0,844                                          | 0,006  | -1,1744                | -2,3683                                        | 0,0196  | 1,1000    |
| CD33     | Anti-inflammatory                          | classical     | 24 h              | 13 | 0,225   | 0,362                       | -0,237                                          | 0,761  | 0,8505                 | -0,6052                                        | 2,3063  | -0,6474   |
| CD36     | Pro-inflammatory                           | classical     | 24 h              | 13 | 0,174   | 0,401                       | -0,192                                          | 0,780  | 0,6225                 | -0,3199                                        | 1,5648  | 0,0030    |
| CD38     | Immune modulator                           | classical     | 24 h              | 13 | 0,696   | 0,120                       | -0,461                                          | 0,629  | 0,2848                 | -1,2781                                        | 1,8476  | -0,3963   |
| CD40     | Pro-inflammatory                           | classical     | 24 h              | 13 | 0,513   | -0,200                      | -0,676                                          | 0,395  | -0,6021                | -2,5606                                        | 1,3563  | -0,1768   |
| CD64     | Pro-inflammatory                           | classical     | 24 h              | 13 | 0,955   | 0,018                       | -0,539                                          | 0,563  | 0,0177                 | -0,6536                                        | 0,6890  | 0,1246    |
| CD86     | Pro-inflammatory                           | classical     | 24 h              | 13 | 0,582   | 0,168                       | -0,422                                          | 0,658  | 0,2852                 | -0,8223                                        | 1,3928  | -0,9986   |
| CD91     | Immune modulator                           | classical     | 24 h              | 13 | 0,032   | 0,594                       | 0,064                                           | 0,863  | 1,5691                 | 0,1581                                         | 2,9801  | -1,1215   |
| CX3CR1   | Anti-inflammatory                          | classical     | 24 h              | 12 | 0,179   | -0,415                      | -0,799                                          | 0,208  | -0,4183                | -1,0641                                        | 0,2274  | -0,0511   |
| GAPDH    | Housekeeping                               | classical     | 24 h              | 13 | 0,927   | 0,028                       | -0,531                                          | 0,570  | 0,0708                 | -1,5892                                        | 1,7309  | -0,1449   |
| IFITM2   | interferon response and antiviral immunity | classical     | 24 h              | 13 | 0,939   | -0,024                      | -0,567                                          | 0,534  | -0,0500                | -1,4564                                        | 1,3564  | -0,0241   |
| IL10     | Anti-inflammatory                          | classical     | 24 h              | 13 | 0,483   | -0,214                      | -0,684                                          | 0,382  | -0,6205                | -2,5027                                        | 1,2616  | 0,5351    |
| IL1B     | Pro-inflammatory                           | classical     | 24 h              | 13 | 0,786   | -0,084                      | -0,607                                          | 0,490  | -0,1087                | -0,9670                                        | 0,7496  | 0,4861    |
| MARCO    | Phagocytotic activity, scavenger receptor  | classical     | 24 h              | 13 | 0,412   | -0,249                      | -0,703                                          | 0,350  | -0,9904                | -3,5494                                        | 1,5686  | 0,3738    |
| SIGLEC10 | Anti-inflammatory                          | classical     | 24 h              | 13 | 0,482   | -0,214                      | -0,684                                          | 0,382  | -0,5074                | -2,0436                                        | 1,0287  | -0,3873   |
| SLC24A4  | cellular calcium ion homeostasis           | classical     | 24 h              | 13 | 0,390   | 0,261                       | -0,339                                          | 0,710  | 0,4720                 | -0,6882                                        | 1,6323  | -0,2358   |
| STAT6    | Anti-inflammatory                          | classical     | 24 h              | 13 | 0,818   | 0,071                       | -0,499                                          | 0,599  | 0,1305                 | -1,0850                                        | 1,3460  | -0,4843   |
| TGFB1    | Anti-inflammatory, immune modulator        | classical     | 24 h              | 13 | 0,132   | -0,441                      | -0,798                                          | 0,146  | -0,6738                | -1,5849                                        | 0,2373  | 0,2797    |
| TGM2     | Immune modulator                           | classical     | 24 h              | 13 | 0,939   | -0,024                      | -0,567                                          | 0,534  | -0,0623                | -1,8024                                        | 1,6778  | -0,5310   |
| TLR8     | Pro-inflammatory                           | classical     | 24 h              | 13 | 0,862   | 0,054                       | -0,513                                          | 0,587  | 0,1365                 | -1,5529                                        | 1,8260  | -0,5575   |
| TNFA     | Pro-inflammatory                           | classical     | 24 h              | 13 | 0,745   | -0,100                      | -0,617                                          | 0,477  | -0,2962                | -2,2540                                        | 1,6615  | -0,5155   |
| TREM1    | Pro-inflammatory                           | classical     | 24 h              | 13 | 0,592   | -0,164                      | -0,656                                          | 0,425  | -0,2062                | -1,0280                                        | 0,6156  | 0,8205    |
| TSPO     | Anti-inflammatory                          | classical     | 24 h              | 13 | 0,101   | 0,475                       | -0,103                                          | 0,813  | 0,6645                 | -0,1524                                        | 1,4814  | -0,1430   |
| ACTB     | Housekeeping                               | intermediate  | 24 h              | 13 | 0,151   | -0,422                      | -0,790                                          | 0,168  | -1,2645                | -3,0665                                        | 0,5375  | 1,1495    |
| ANXA1    | Anti-inflammatory                          | intermediate  | 24 h              | 13 | 0,178   | -0,398                      | -0,778                                          | 0,196  | -1,5629                | -3,9518                                        | 0,8260  | 0,9610    |
| B2M      | Housekeeping                               | intermediate  | 24 h              | 13 | 0,175   | -0,401                      | -0,780                                          | 0,193  | -0,7777                | -1,9575                                        | 0,4021  | 0,6916    |
| BDNF     | Neuroplasticity                            | intermediate  | 24 h              | 13 | 0,616   | -0,154                      | -0,650                                          | 0,434  | -0,2727                | -1,4359                                        | 0,8905  | 0,5248    |

|                 |                                            |              |       |    |       |        |        |        |         |         |         |         |
|-----------------|--------------------------------------------|--------------|-------|----|-------|--------|--------|--------|---------|---------|---------|---------|
| <b>CCR2</b>     | Monocyte infiltration                      | intermediate | 24 h  | 13 | 0,067 | -0,523 | -0,834 | 0,040  | -2,1494 | -4,4749 | 0,1761  | 1,2951  |
| <b>CD11B</b>    | Monocyte adhesion and migration            | intermediate | 24 h  | 13 | 0,158 | -0,415 | -0,786 | 0,176  | -0,7511 | -1,8424 | 0,3402  | 0,7246  |
| <b>CD11C</b>    | Monocyte adhesion                          | intermediate | 24 h  | 13 | 0,033 | -0,593 | -0,862 | -0,063 | -1,3309 | -2,5289 | -0,1330 | 1,1328  |
| <b>CD169</b>    | Pro-inflammatory                           | intermediate | 24 h  | 13 | 0,024 | -0,619 | -0,873 | -0,104 | -1,9741 | -3,6344 | -0,3138 | 1,5092  |
| <b>CD31</b>     | Anti-inflammatory                          | intermediate | 24 h  | 13 | 0,210 | -0,373 | -0,766 | 0,224  | -0,7712 | -2,0446 | 0,5023  | 0,8634  |
| <b>CD32</b>     | Immune modulator                           | intermediate | 24 h  | 13 | 0,110 | -0,464 | -0,808 | 0,116  | -1,4386 | -3,2595 | 0,3822  | 1,2892  |
| <b>CD33</b>     | Anti-inflammatory                          | intermediate | 24 h  | 13 | 0,149 | 0,424  | -0,165 | 0,790  | 1,3626  | -0,5676 | 3,2928  | -0,7779 |
| <b>CD36</b>     | Pro-inflammatory                           | intermediate | 24 h  | 13 | 0,024 | 0,620  | 0,105  | 0,873  | 1,3205  | 0,2120  | 2,4290  | -0,9433 |
| <b>CD38</b>     | Immune modulator                           | intermediate | 24 h  | 13 | 0,256 | 0,339  | -0,260 | 0,750  | 0,5154  | -0,4324 | 1,4633  | -0,0659 |
| <b>CD40</b>     | Pro-inflammatory                           | intermediate | 24 h  | 13 | 0,259 | -0,338 | -0,749 | 0,262  | -0,9624 | -2,7433 | 0,8185  | 0,8635  |
| <b>CD64</b>     | Pro-inflammatory                           | intermediate | 24 h  | 13 | 0,567 | -0,175 | -0,662 | 0,416  | -0,4752 | -2,2484 | 1,2981  | 0,3529  |
| <b>CD86</b>     | Pro-inflammatory                           | intermediate | 24 h  | 13 | 0,441 | 0,234  | -0,364 | 0,695  | 0,5791  | -1,0158 | 2,1740  | -0,3137 |
| <b>CD91</b>     | Immune modulator                           | intermediate | 24 h  | 13 | 0,059 | 0,536  | -0,021 | 0,839  | 1,6579  | -0,0754 | 3,3911  | -1,1694 |
| <b>CX3CR1</b>   | Anti-inflammatory                          | intermediate | 24 h  | 13 | 0,350 | -0,283 | -0,721 | 0,318  | -0,6338 | -2,0616 | 0,7939  | 0,7496  |
| <b>GAPDH</b>    | Housekeeping                               | intermediate | 24 h  | 13 | 0,566 | -0,176 | -0,662 | 0,416  | -0,5340 | -2,5207 | 1,4528  | 0,3508  |
| <b>IFITM2</b>   | interferon response and antiviral immunity | intermediate | 24 h  | 13 | 0,274 | -0,328 | -0,744 | 0,272  | -0,9196 | -2,6776 | 0,8384  | 0,6784  |
| <b>IL10</b>     | Anti-inflammatory                          | intermediate | 24 h  | 13 | 0,987 | 0,005  | -0,548 | 0,554  | 0,0128  | -1,6969 | 1,7224  | 0,3412  |
| <b>IL1B</b>     | Pro-inflammatory                           | intermediate | 24 h  | 13 | 0,703 | 0,117  | -0,464 | 0,628  | 0,3186  | -1,4753 | 2,1125  | 0,0361  |
| <b>MARCO</b>    | Phagocytotic activity, scavenger receptor  | intermediate | 24 h  | 13 | 0,898 | -0,040 | -0,578 | 0,523  | -0,1581 | -2,7980 | 2,4818  | -0,0618 |
| <b>SIGLEC10</b> | Anti-inflammatory                          | intermediate | 24 h  | 13 | 0,159 | -0,415 | -0,786 | 0,177  | -1,0263 | -2,5208 | 0,4682  | 0,9384  |
| <b>SLC24A4</b>  | cellular calcium ion homeostasis           | intermediate | 24 h  | 13 | 0,105 | 0,470  | -0,109 | 0,811  | 1,4777  | -0,3624 | 3,3179  | -0,9410 |
| <b>STAT6</b>    | Anti-inflammatory                          | intermediate | 24 h  | 13 | 0,933 | 0,026  | -0,533 | 0,569  | 0,0521  | -1,2874 | 1,3916  | -0,0599 |
| <b>TGFB1</b>    | Anti-inflammatory, immune modulator        | intermediate | 24 h  | 13 | 0,056 | -0,541 | -0,841 | 0,015  | -0,9793 | -1,9905 | 0,0319  | 0,6818  |
| <b>TGM2</b>     | Immune modulator                           | intermediate | 24 h  | 13 | 0,007 | 0,706  | 0,254  | 0,905  | 1,4125  | 0,4723  | 2,3527  | -0,6790 |
| <b>TLR8</b>     | Pro-inflammatory                           | intermediate | 24 h  | 13 | 0,816 | 0,071  | -0,499 | 0,599  | 0,1852  | -1,5297 | 1,9001  | -0,4019 |
| <b>TNFA</b>     | Pro-inflammatory                           | intermediate | 24 h  | 13 | 0,432 | -0,239 | -0,698 | 0,359  | -0,7645 | -2,8262 | 1,2972  | 0,4652  |
| <b>TREM1</b>    | Pro-inflammatory                           | intermediate | 24 h  | 13 | 0,560 | -0,178 | -0,664 | 0,413  | -0,2713 | -1,2638 | 0,7213  | 0,2723  |
| <b>TSPO</b>     | Anti-inflammatory                          | intermediate | 24 h  | 13 | 0,661 | -0,135 | -0,638 | 0,450  | -0,2610 | -1,5346 | 1,0125  | 0,4224  |
| <b>ACTB</b>     | Housekeeping                               | nonclassical | 24 h  | 13 | 0,281 | -0,323 | -0,742 | 0,277  | -0,9376 | -2,7594 | 0,8842  | 1,1174  |
| <b>ANXA1</b>    | Anti-inflammatory                          | nonclassical | 24 h  | 13 | 0,337 | -0,290 | -0,725 | 0,311  | -1,1125 | -3,5534 | 1,3284  | 0,8571  |
| <b>B2M</b>      | Housekeeping                               | nonclassical | 24 h  | 13 | 0,842 | -0,061 | -0,592 | 0,507  | -0,0612 | -0,7222 | 0,5999  | 0,4569  |
| <b>BDNF</b>     | Neuroplasticity                            | nonclassical | 24 h  | 13 | 0,314 | 0,303  | -0,298 | 0,732  | 1,0091  | -1,0974 | 3,1156  | -0,1347 |
| <b>CCR2</b>     | Monocyte infiltration                      | nonclassical | 24 h  | 13 | 0,057 | -0,540 | -0,841 | 0,016  | -2,2928 | -4,6664 | 0,0808  | 1,0084  |
| <b>CD11B</b>    | Monocyte adhesion and migration            | nonclassical | 24 h  | 13 | 0,505 | -0,204 | -0,678 | 0,391  | -0,4180 | -1,7516 | 0,9157  | -0,4167 |
| <b>CD11C</b>    | Monocyte adhesion                          | nonclassical | 24 h  | 13 | 0,104 | -0,472 | -0,812 | 0,107  | -0,7194 | -1,6123 | 0,1735  | 1,3342  |
| <b>CD169</b>    | Pro-inflammatory                           | nonclassical | 24 h  | 13 | 0,233 | 0,356  | -0,243 | 0,758  | 0,8696  | -0,6462 | 2,3855  | -1,8733 |
| <b>CD31</b>     | Anti-inflammatory                          | nonclassical | 24 h  | 13 | 0,888 | 0,044  | -0,520 | 0,581  | 0,0393  | -0,5590 | 0,6376  | 0,9404  |
| <b>CD32</b>     | Immune modulator                           | nonclassical | 24 h  | 13 | 0,204 | -0,377 | -0,768 | 0,220  | -1,4945 | -3,9318 | 0,9428  | 1,2230  |
| <b>CD33</b>     | Anti-inflammatory                          | nonclassical | 24 h  | 13 | 0,080 | 0,503  | -0,067 | 0,825  | 1,6676  | -0,2353 | 3,5705  | -0,9055 |
| <b>CD36</b>     | Pro-inflammatory                           | nonclassical | 24 h  | 13 | 0,157 | 0,417  | -0,174 | 0,787  | 1,2009  | -0,5371 | 2,9388  | -1,7680 |
| <b>CD38</b>     | Immune modulator                           | nonclassical | 24 h  | 13 | 0,052 | 0,550  | -0,002 | 0,845  | 2,5123  | -0,0207 | 5,0452  | -2,8542 |
| <b>CD40</b>     | Pro-inflammatory                           | nonclassical | 24 h  | 13 | 0,328 | -0,295 | -0,728 | 0,306  | -1,2729 | -4,0097 | 1,4640  | 0,8600  |
| <b>CD64</b>     | Pro-inflammatory                           | nonclassical | 24 h  | 13 | 0,474 | -0,218 | -0,686 | 0,378  | -0,9078 | -3,6056 | 1,7900  | 0,2107  |
| <b>CD86</b>     | Pro-inflammatory                           | nonclassical | 24 h  | 13 | 0,238 | 0,352  | -0,247 | 0,756  | 0,8724  | -0,6669 | 2,4116  | 0,2567  |
| <b>CD91</b>     | Immune modulator                           | nonclassical | 24 h  | 13 | 0,047 | 0,560  | 0,013  | 0,849  | 1,7029  | 0,0295  | 3,3762  | -1,2492 |
| <b>CX3CR1</b>   | Anti-inflammatory                          | nonclassical | 24 h  | 13 | 0,725 | 0,108  | -0,471 | 0,622  | 0,2620  | -1,3346 | 1,8586  | 0,5384  |
| <b>GAPDH</b>    | Housekeeping                               | nonclassical | 24 h  | 13 | 0,717 | -0,112 | -0,624 | 0,468  | -0,4060 | -2,8059 | 1,9939  | 0,2152  |
| <b>IFITM2</b>   | interferon response and antiviral immunity | nonclassical | 24 h  | 13 | 0,961 | 0,015  | -0,540 | 0,561  | 0,0364  | -1,5696 | 1,6423  | 0,1113  |
| <b>IL10</b>     | Anti-inflammatory                          | nonclassical | 24 h  | 13 | 0,845 | -0,060 | -0,592 | 0,508  | -0,1404 | -1,6843 | 1,4036  | -0,2708 |
| <b>IL1B</b>     | Pro-inflammatory                           | nonclassical | 24 h  | 13 | 0,392 | 0,260  | -0,340 | 0,709  | 0,7429  | -1,0918 | 2,5777  | -0,7968 |
| <b>MARCO</b>    | Phagocytotic activity, scavenger receptor  | nonclassical | 24 h  | 13 | 0,157 | -0,417 | -0,787 | 0,174  | -1,3312 | -3,2587 | 0,5963  | 0,4745  |
| <b>SIGLEC10</b> | Anti-inflammatory                          | nonclassical | 24 h  | 13 | 0,213 | -0,370 | -0,765 | 0,227  | -1,2176 | -3,2443 | 0,8092  | 1,5952  |
| <b>SLC24A4</b>  | cellular calcium ion homeostasis           | nonclassical | 24 h  | 13 | 0,080 | 0,503  | -0,066 | 0,825  | 1,3914  | -0,1944 | 2,9772  | -1,1275 |
| <b>STAT6</b>    | Anti-inflammatory                          | nonclassical | 24 h  | 13 | 0,712 | 0,114  | -0,467 | 0,625  | 0,3662  | -1,7579 | 2,4903  | 0,1148  |
| <b>TGFB1</b>    | Anti-inflammatory, immune modulator        | nonclassical | 24 h  | 13 | 0,534 | -0,190 | -0,671 | 0,403  | -0,2144 | -0,9496 | 0,5208  | 0,4286  |
| <b>TGM2</b>     | Immune modulator                           | nonclassical | 24 h  | 13 | 0,883 | -0,045 | -0,582 | 0,519  | -0,1438 | -2,2527 | 1,9651  | -0,1362 |
| <b>TLR8</b>     | Pro-inflammatory                           | nonclassical | 24 h  | 12 | 0,985 | 0,006  | -0,570 | 0,578  | 0,0076  | -0,8698 | 0,8849  | -0,0496 |
| <b>TNFA</b>     | Pro-inflammatory                           | nonclassical | 24 h  | 13 | 0,588 | -0,166 | -0,657 | 0,424  | -0,6397 | -3,1655 | 1,8860  | 0,5865  |
| <b>TREM1</b>    | Pro-inflammatory                           | nonclassical | 24 h  | 13 | 0,294 | 0,315  | -0,285 | 0,738  | 0,6092  | -0,6078 | 1,8262  | -1,0239 |
| <b>TSPO</b>     | Anti-inflammatory                          | nonclassical | 24 h  | 13 | 0,242 | 0,349  | -0,250 | 0,755  | 0,8462  | -0,6598 | 2,3521  | -0,7887 |
| <b>ACTB</b>     | Housekeeping                               | all          | 3-5 d | 13 | 0,201 | -0,380 | -0,770 | 0,217  | -0,9302 | -2,4350 | 0,5745  | 0,7009  |
| <b>ANXA1</b>    | Anti-inflammatory                          | all          | 3-5 d | 13 | 0,439 | -0,235 | -0,696 | 0,363  | -0,8754 | -3,2772 | 1,5264  | 0,8213  |
| <b>B2M</b>      | Housekeeping                               | all          | 3-5 d | 13 | 0,118 | -0,456 | -0,805 | 0,127  | -0,6851 | -1,5731 | 0,2030  | 0,3639  |
| <b>BDNF</b>     | Neuroplasticity                            | all          | 3-5 d | 13 | 0,120 | 0,453  | -0,131 | 0,803  | 0,8339  | -0,2559 | 1,9238  | -0,6687 |
| <b>CCR2</b>     | Monocyte infiltration                      | all          | 3-5 d | 13 | 0,016 | -0,651 | -0,885 | -0,156 | -1,8359 | -3,2563 | -0,4155 | 1,7364  |
| <b>CD11B</b>    | Monocyte adhesion and migration            | all          | 3-5 d | 13 | 0,070 | -0,518 | -0,832 | 0,046  | -0,6643 | -1,3916 | 0,0630  | 1,0515  |
| <b>CD11C</b>    | Monocyte adhesion                          | all          | 3-5 d | 13 | 0,158 | -0,416 | -0,787 | 0,175  | -0,8365 | -2,0503 | 0,3774  | 0,4665  |
| <b>CD169</b>    | Pro-inflammatory                           | all          | 3-5 d | 13 | 0,797 | 0,079  | -0,493 | 0,604  | 0,1641  | -1,2041 | 1,5323  | 0,2964  |
| <b>CD31</b>     | Anti-inflammatory                          | all          | 3-5 d | 13 | 0,273 | -0,328 | -0,745 | 0,272  | -0,5328 | -1,5500 | 0,4844  | 0,1422  |
| <b>CD32</b>     | Immune modulator                           | all          | 3-5 d | 13 | 0,321 | -0,299 | -0,730 | 0,302  | -0,7538 | -2,3501 | 0,8424  | 0,6505  |
| <b>CD33</b>     | Anti-inflammatory                          | all          | 3-5 d | 13 | 0,911 | 0,034  | -0,527 | 0,575  | 0,0547  | -0,9974 | 1,1068  | 0,2815  |
| <b>CD36</b>     | Pro-inflammatory                           | all          | 3-5 d | 13 | 0,872 | 0,050  | -0,515 | 0,585  | 0,0845  | -1,0398 | 1,2088  | 0,6326  |
| <b>CD38</b>     | Immune modulator                           | all          | 3-5 d | 13 | 0,260 | 0,337  | -0,262 | 0,749  | 1,0231  | -0,8711 | 2,9172  | -1,0385 |

|          |                                            |              |       |    |       |        |        |        |         |         |         |         |
|----------|--------------------------------------------|--------------|-------|----|-------|--------|--------|--------|---------|---------|---------|---------|
| CD40     | Pro-inflammatory                           | all          | 3-5 d | 13 | 0,509 | 0,202  | -0,393 | 0,677  | 0,7868  | -1,7492 | 3,3227  | -0,9321 |
| CD64     | Pro-inflammatory                           | all          | 3-5 d | 13 | 0,193 | -0,386 | -0,773 | 0,210  | -0,6396 | -1,6544 | 0,3751  | 0,6934  |
| CD86     | Pro-inflammatory                           | all          | 3-5 d | 13 | 0,097 | 0,480  | -0,097 | 0,815  | 0,8618  | -0,1839 | 1,9076  | -0,9643 |
| CD91     | Immune modulator                           | all          | 3-5 d | 13 | 0,117 | 0,456  | -0,126 | 0,805  | 0,9746  | -0,2862 | 2,2354  | -0,5889 |
| CX3CR1   | Anti-inflammatory                          | all          | 3-5 d | 13 | 0,022 | -0,628 | -0,876 | -0,118 | -1,1770 | -2,1453 | -0,2088 | 0,7488  |
| GAPDH    | Housekeeping                               | all          | 3-5 d | 13 | 0,951 | -0,019 | -0,564 | 0,538  | -0,0512 | -1,8386 | 1,7361  | -0,0889 |
| IFITM2   | interferon response and antiviral immunity | all          | 3-5 d | 13 | 0,013 | 0,665  | 0,181  | 0,890  | 0,8759  | 0,2238  | 1,5279  | -0,7931 |
| IL10     | Anti-inflammatory                          | all          | 3-5 d | 13 | 0,774 | 0,088  | -0,486 | 0,610  | 0,2535  | -1,6414 | 2,1484  | -0,3080 |
| IL1B     | Pro-inflammatory                           | all          | 3-5 d | 13 | 0,087 | 0,493  | -0,079 | 0,821  | 0,7659  | -0,1305 | 1,6622  | -0,5549 |
| MARCO    | Phagocytotic activity, scavenger receptor  | all          | 3-5 d | 13 | 0,420 | -0,245 | -0,701 | 0,354  | -0,8188 | -2,9685 | 1,3309  | 0,3423  |
| SIGLEC10 | Anti-inflammatory                          | all          | 3-5 d | 13 | 0,470 | -0,220 | -0,688 | 0,377  | -0,4877 | -1,9223 | 0,9468  | 0,0066  |
| SLC24A4  | cellular calcium ion homeostasis           | all          | 3-5 d | 13 | 0,152 | 0,421  | -0,170 | 0,789  | 0,6953  | -0,3002 | 1,6908  | -0,4518 |
| STAT6    | Anti-inflammatory                          | all          | 3-5 d | 13 | 0,683 | -0,126 | -0,633 | 0,457  | -0,2818 | -1,7593 | 1,1957  | 0,0975  |
| TGFB1    | Anti-inflammatory, immune modulator        | all          | 3-5 d | 13 | 0,305 | -0,309 | -0,735 | 0,292  | -0,6253 | -1,9047 | 0,6541  | 0,2657  |
| TGM2     | Immune modulator                           | all          | 3-5 d | 13 | 0,052 | 0,549  | -0,003 | 0,844  | 1,7846  | -0,0199 | 3,5891  | -1,8241 |
| TLR8     | Pro-inflammatory                           | all          | 3-5 d | 13 | 0,116 | -0,457 | -0,805 | 0,125  | -0,8797 | -2,0145 | 0,2550  | 0,2086  |
| TNFA     | Pro-inflammatory                           | all          | 3-5 d | 13 | 0,108 | 0,467  | -0,114 | 0,809  | 1,4756  | -0,3808 | 3,3320  | -1,6732 |
| TREM1    | Pro-inflammatory                           | all          | 3-5 d | 13 | 0,390 | 0,260  | -0,339 | 0,710  | 0,3843  | -0,5616 | 1,3301  | 0,3081  |
| TSPO     | Anti-inflammatory                          | all          | 3-5 d | 13 | 0,739 | 0,102  | -0,475 | 0,619  | 0,1647  | -0,8967 | 1,2260  | 0,3319  |
| ACTB     | Housekeeping                               | classical    | 3-5 d | 13 | 0,400 | -0,255 | -0,707 | 0,344  | -0,5737 | -2,0159 | 0,8685  | 0,3309  |
| ANXA1    | Anti-inflammatory                          | classical    | 3-5 d | 13 | 0,443 | -0,234 | -0,695 | 0,364  | -1,0373 | -3,9032 | 1,8286  | 0,7707  |
| B2M      | Housekeeping                               | classical    | 3-5 d | 13 | 0,357 | -0,278 | -0,719 | 0,322  | -0,8699 | -2,8617 | 1,1219  | 0,4329  |
| BDNF     | Neuroplasticity                            | classical    | 3-5 d | 13 | 0,481 | 0,215  | -0,381 | 0,685  | 0,4961  | -1,0019 | 1,9940  | -0,3885 |
| CCR2     | Monocyte infiltration                      | classical    | 3-5 d | 13 | 0,024 | -0,619 | -0,872 | -0,103 | -1,7112 | -3,1521 | -0,2703 | 1,7364  |
| CD11B    | Monocyte adhesion and migration            | classical    | 3-5 d | 13 | 0,288 | -0,319 | -0,740 | 0,281  | -0,7758 | -2,3043 | 0,7526  | 0,8630  |
| CD11C    | Monocyte adhesion                          | classical    | 3-5 d | 13 | 0,036 | -0,584 | -0,858 | -0,048 | -1,1855 | -2,2804 | -0,0906 | 0,4500  |
| CD169    | Pro-inflammatory                           | classical    | 3-5 d | 13 | 0,853 | -0,057 | -0,590 | 0,510  | -0,0819 | -1,0312 | 0,8673  | 0,7368  |
| CD31     | Anti-inflammatory                          | classical    | 3-5 d | 12 | 0,233 | -0,372 | -0,780 | 0,256  | -0,3821 | -1,0532 | 0,2889  | -0,0254 |
| CD32     | Immune modulator                           | classical    | 3-5 d | 13 | 0,464 | -0,223 | -0,689 | 0,374  | -0,7036 | -2,7454 | 1,3381  | 0,7297  |
| CD33     | Anti-inflammatory                          | classical    | 3-5 d | 13 | 0,415 | 0,247  | -0,351 | 0,703  | 0,4206  | -0,6721 | 1,5134  | -0,2934 |
| CD36     | Pro-inflammatory                           | classical    | 3-5 d | 13 | 0,899 | 0,039  | -0,523 | 0,578  | 0,0620  | -0,9934 | 1,1175  | 0,3775  |
| CD38     | Immune modulator                           | classical    | 3-5 d | 13 | 0,032 | 0,595  | 0,065  | 0,863  | 2,8899  | 0,2971  | 5,4828  | -2,5757 |
| CD40     | Pro-inflammatory                           | classical    | 3-5 d | 13 | 0,942 | -0,022 | -0,566 | 0,535  | -0,0827 | -2,5420 | 2,3766  | -0,0681 |
| CD64     | Pro-inflammatory                           | classical    | 3-5 d | 13 | 0,456 | -0,227 | -0,691 | 0,370  | -0,4189 | -1,6116 | 0,7738  | 0,6343  |
| CD86     | Pro-inflammatory                           | classical    | 3-5 d | 13 | 0,886 | -0,044 | -0,581 | 0,519  | -0,0907 | -1,4506 | 1,2693  | -0,6514 |
| CD91     | Immune modulator                           | classical    | 3-5 d | 13 | 0,113 | 0,461  | -0,121 | 0,807  | 1,5195  | -0,4215 | 3,4606  | -1,1222 |
| CX3CR1   | Anti-inflammatory                          | classical    | 3-5 d | 13 | 0,029 | -0,604 | -0,867 | -0,080 | -1,1708 | -2,1948 | -0,1469 | 0,5176  |
| GAPDH    | Housekeeping                               | classical    | 3-5 d | 13 | 0,874 | 0,049  | -0,516 | 0,584  | 0,1185  | -1,4896 | 1,7266  | -0,0895 |
| IFITM2   | interferon response and antiviral immunity | classical    | 3-5 d | 13 | 0,914 | 0,033  | -0,527 | 0,574  | 0,0815  | -1,5375 | 1,7005  | -0,1356 |
| IL10     | Anti-inflammatory                          | classical    | 3-5 d | 13 | 0,563 | -0,177 | -0,663 | 0,415  | -0,5682 | -2,6669 | 1,5306  | 0,5060  |
| IL1B     | Pro-inflammatory                           | classical    | 3-5 d | 13 | 0,351 | -0,282 | -0,721 | 0,319  | -0,6356 | -2,0714 | 0,8001  | 0,3155  |
| MARCO    | Phagocytotic activity, scavenger receptor  | classical    | 3-5 d | 13 | 0,403 | 0,253  | -0,346 | 0,706  | 1,0527  | -1,6137 | 3,7192  | -1,1424 |
| SIGLEC10 | Anti-inflammatory                          | classical    | 3-5 d | 13 | 0,865 | 0,052  | -0,513 | 0,586  | 0,1583  | -1,8435 | 2,1601  | -0,7284 |
| SLC24A4  | cellular calcium ion homeostasis           | classical    | 3-5 d | 13 | 0,017 | 0,648  | 0,151  | 0,884  | 1,1640  | 0,2565  | 2,0715  | -0,8453 |
| STAT6    | Anti-inflammatory                          | classical    | 3-5 d | 13 | 0,461 | -0,225 | -0,690 | 0,372  | -0,4551 | -1,7654 | 0,8552  | 0,0217  |
| TGFB1    | Anti-inflammatory, immune modulator        | classical    | 3-5 d | 13 | 0,334 | -0,291 | -0,726 | 0,309  | -1,0037 | -3,1912 | 1,1838  | 0,4281  |
| TGM2     | Immune modulator                           | classical    | 3-5 d | 13 | 0,302 | 0,311  | -0,290 | 0,736  | 1,0724  | -1,1062 | 3,2510  | -1,3191 |
| TLR8     | Pro-inflammatory                           | classical    | 3-5 d | 13 | 0,776 | -0,088 | -0,609 | 0,487  | -0,2038 | -1,7423 | 1,3346  | -0,0301 |
| TNFA     | Pro-inflammatory                           | classical    | 3-5 d | 13 | 0,606 | 0,158  | -0,430 | 0,652  | 0,6506  | -2,0426 | 3,3438  | -1,0960 |
| TREM1    | Pro-inflammatory                           | classical    | 3-5 d | 13 | 0,572 | 0,173  | -0,418 | 0,661  | 0,2409  | -0,6691 | 1,1509  | 0,4403  |
| TSPO     | Anti-inflammatory                          | classical    | 3-5 d | 13 | 0,755 | 0,096  | -0,480 | 0,614  | 0,2517  | -1,4814 | 1,9848  | 0,1308  |
| ACTB     | Housekeeping                               | intermediate | 3-5 d | 13 | 0,219 | -0,366 | -0,763 | 0,232  | -1,1133 | -2,9909 | 0,7643  | 1,2622  |
| ANXA1    | Anti-inflammatory                          | intermediate | 3-5 d | 13 | 0,613 | -0,155 | -0,650 | 0,433  | -0,6543 | -3,4202 | 2,1115  | 0,1530  |
| B2M      | Housekeeping                               | intermediate | 3-5 d | 13 | 0,201 | -0,379 | -0,770 | 0,217  | -0,6130 | -1,6051 | 0,3792  | 0,6680  |
| BDNF     | Neuroplasticity                            | intermediate | 3-5 d | 13 | 0,932 | 0,026  | -0,533 | 0,569  | 0,0376  | -0,9162 | 0,9914  | 0,3648  |
| CCR2     | Monocyte infiltration                      | intermediate | 3-5 d | 13 | 0,036 | -0,584 | -0,859 | -0,049 | -2,2588 | -4,3402 | -0,1774 | 1,2479  |
| CD11B    | Monocyte adhesion and migration            | intermediate | 3-5 d | 13 | 0,333 | -0,292 | -0,726 | 0,308  | -0,6078 | -1,9275 | 0,7120  | 0,5376  |
| CD11C    | Monocyte adhesion                          | intermediate | 3-5 d | 13 | 0,163 | -0,411 | -0,784 | 0,181  | -1,3309 | -3,2918 | 0,6301  | 1,3809  |
| CD169    | Pro-inflammatory                           | intermediate | 3-5 d | 13 | 0,365 | 0,274  | -0,326 | 0,717  | 0,9342  | -1,2413 | 3,1097  | -0,5121 |
| CD31     | Anti-inflammatory                          | intermediate | 3-5 d | 13 | 0,372 | -0,270 | -0,715 | 0,330  | -0,7176 | -2,4147 | 0,9796  | 0,9427  |
| CD32     | Immune modulator                           | intermediate | 3-5 d | 13 | 0,087 | -0,494 | -0,821 | 0,079  | -1,3924 | -3,0208 | 0,2361  | 1,1898  |
| CD33     | Anti-inflammatory                          | intermediate | 3-5 d | 13 | 0,255 | 0,341  | -0,259 | 0,751  | 0,5162  | -0,4289 | 1,4613  | 0,0631  |
| CD36     | Pro-inflammatory                           | intermediate | 3-5 d | 13 | 0,438 | 0,236  | -0,362 | 0,696  | 0,4188  | -0,7262 | 1,5637  | -0,4418 |
| CD38     | Immune modulator                           | intermediate | 3-5 d | 13 | 0,001 | 0,798  | 0,441  | 0,937  | 1,1228  | 0,5604  | 1,6852  | -0,4010 |
| CD40     | Pro-inflammatory                           | intermediate | 3-5 d | 13 | 0,234 | -0,355 | -0,758 | 0,243  | -0,7656 | -2,1025 | 0,5713  | 0,8423  |
| CD64     | Pro-inflammatory                           | intermediate | 3-5 d | 13 | 0,149 | -0,424 | -0,790 | 0,166  | -1,0634 | -2,5713 | 0,4445  | 1,0424  |
| CD86     | Pro-inflammatory                           | intermediate | 3-5 d | 13 | 0,263 | 0,335  | -0,264 | 0,748  | 0,7723  | -0,6670 | 2,2115  | -0,3913 |
| CD91     | Immune modulator                           | intermediate | 3-5 d | 13 | 0,086 | 0,494  | -0,078 | 0,821  | 1,3794  | -0,2320 | 2,9909  | -0,8221 |
| CX3CR1   | Anti-inflammatory                          | intermediate | 3-5 d | 13 | 0,128 | -0,445 | -0,800 | 0,141  | -1,3269 | -3,0995 | 0,4457  | 1,5471  |
| GAPDH    | Housekeeping                               | intermediate | 3-5 d | 13 | 0,743 | -0,101 | -0,618 | 0,477  | -0,2838 | -2,1405 | 1,5729  | 0,1713  |
| IFITM2   | interferon response and antiviral immunity | intermediate | 3-5 d | 13 | 0,578 | -0,170 | -0,659 | 0,420  | -0,3520 | -1,7030 | 0,9989  | 0,2996  |
| IL10     | Anti-inflammatory                          | intermediate | 3-5 d | 13 | 0,482 | 0,214  | -0,382 | 0,684  | 0,5323  | -1,0779 | 2,1425  | -0,5363 |
| IL1B     | Pro-inflammatory                           | intermediate | 3-5 d | 13 | 0,887 | 0,044  | -0,520 | 0,581  | 0,0689  | -0,9732 | 1,1111  | 0,2997  |

|                 |                                            |              |       |    |       |        |        |        |         |         |         |         |
|-----------------|--------------------------------------------|--------------|-------|----|-------|--------|--------|--------|---------|---------|---------|---------|
| <b>MARCO</b>    | Phagocytotic activity, scavenger receptor  | intermediate | 3-5 d | 13 | 0,572 | -0,173 | -0,661 | 0,418  | -0,6393 | -3,0552 | 1,7766  | 0,4959  |
| <b>SIGLEC10</b> | Anti-inflammatory                          | intermediate | 3-5 d | 13 | 0,171 | -0,404 | -0,781 | 0,189  | -0,9499 | -2,3781 | 0,4782  | 1,1114  |
| <b>SLC24A4</b>  | cellular calcium ion homeostasis           | intermediate | 3-5 d | 13 | 0,218 | 0,367  | -0,231 | 0,763  | 0,7310  | -0,4998 | 1,9618  | -0,2357 |
| <b>STAT6</b>    | Anti-inflammatory                          | intermediate | 3-5 d | 13 | 0,591 | -0,164 | -0,656 | 0,425  | -0,5033 | -2,5069 | 1,5002  | 0,5883  |
| <b>TGFB1</b>    | Anti-inflammatory, immune modulator        | intermediate | 3-5 d | 13 | 0,243 | -0,348 | -0,755 | 0,251  | -0,6934 | -1,9311 | 0,5444  | 0,6394  |
| <b>TGM2</b>     | Immune modulator                           | intermediate | 3-5 d | 13 | 0,267 | 0,333  | -0,267 | 0,747  | 0,6183  | -0,5448 | 1,7814  | 0,0094  |
| <b>TLR8</b>     | Pro-inflammatory                           | intermediate | 3-5 d | 13 | 0,171 | -0,404 | -0,781 | 0,189  | -0,7268 | -1,8198 | 0,3661  | 0,4957  |
| <b>TNFA</b>     | Pro-inflammatory                           | intermediate | 3-5 d | 13 | 0,553 | 0,181  | -0,411 | 0,666  | 0,4117  | -1,0698 | 1,8932  | -0,1792 |
| <b>TREM1</b>    | Pro-inflammatory                           | intermediate | 3-5 d | 13 | 0,201 | 0,380  | -0,217 | 0,770  | 0,8021  | -0,4951 | 2,0992  | -0,7221 |
| <b>TSPO</b>     | Anti-inflammatory                          | intermediate | 3-5 d | 13 | 0,875 | 0,048  | -0,516 | 0,584  | 0,0837  | -1,0618 | 1,2292  | 0,3644  |
| <b>ACTB</b>     | Housekeeping                               | nonclassical | 3-5 d | 13 | 0,181 | -0,395 | -0,777 | 0,199  | -1,5116 | -3,8417 | 0,8185  | 1,4994  |
| <b>ANXA1</b>    | Anti-inflammatory                          | nonclassical | 3-5 d | 13 | 0,284 | -0,322 | -0,741 | 0,279  | -1,3844 | -4,0888 | 1,3201  | 0,7580  |
| <b>B2M</b>      | Housekeeping                               | nonclassical | 3-5 d | 12 | 0,079 | -0,525 | -0,845 | 0,069  | -0,4580 | -0,9806 | 0,0646  | 0,7337  |
| <b>BDNF</b>     | Neuroplasticity                            | nonclassical | 3-5 d | 13 | 0,529 | 0,192  | -0,401 | 0,672  | 0,4443  | -1,0597 | 1,9484  | 0,2226  |
| <b>CCR2</b>     | Monocyte infiltration                      | nonclassical | 3-5 d | 13 | 0,169 | -0,406 | -0,782 | 0,187  | -1,5116 | -3,7716 | 0,7484  | 0,5926  |
| <b>CD11B</b>    | Monocyte adhesion and migration            | nonclassical | 3-5 d | 13 | 0,864 | -0,053 | -0,587 | 0,513  | -0,2107 | -2,8562 | 2,4349  | -0,7854 |
| <b>CD11C</b>    | Monocyte adhesion                          | nonclassical | 3-5 d | 13 | 0,053 | -0,546 | -0,843 | 0,007  | -1,8363 | -3,7045 | 0,0319  | 2,0485  |
| <b>CD169</b>    | Pro-inflammatory                           | nonclassical | 3-5 d | 13 | 0,091 | 0,488  | -0,086 | 0,819  | 1,2289  | -0,2308 | 2,6885  | -1,6584 |
| <b>CD31</b>     | Anti-inflammatory                          | nonclassical | 3-5 d | 12 | 0,134 | -0,458 | -0,817 | 0,157  | -0,6757 | -1,5988 | 0,2474  | 1,4383  |
| <b>CD32</b>     | Immune modulator                           | nonclassical | 3-5 d | 12 | 0,940 | 0,024  | -0,557 | 0,590  | 0,0247  | -0,6887 | 0,7380  | 0,2881  |
| <b>CD33</b>     | Anti-inflammatory                          | nonclassical | 3-5 d | 13 | 0,653 | 0,138  | -0,447 | 0,640  | 0,2417  | -0,9079 | 1,3913  | 0,0420  |
| <b>CD36</b>     | Pro-inflammatory                           | nonclassical | 3-5 d | 13 | 0,620 | 0,152  | -0,435 | 0,649  | 0,4203  | -1,3910 | 2,2316  | -1,3622 |
| <b>CD38</b>     | Immune modulator                           | nonclassical | 3-5 d | 13 | 0,758 | 0,095  | -0,481 | 0,614  | 0,4389  | -2,6236 | 3,5014  | -0,9305 |
| <b>CD40</b>     | Pro-inflammatory                           | nonclassical | 3-5 d | 13 | 0,719 | 0,111  | -0,469 | 0,624  | 0,3755  | -1,8638 | 2,6147  | -0,1549 |
| <b>CD64</b>     | Pro-inflammatory                           | nonclassical | 3-5 d | 13 | 0,837 | -0,063 | -0,594 | 0,505  | -0,2077 | -2,3809 | 1,9655  | -0,0056 |
| <b>CD86</b>     | Pro-inflammatory                           | nonclassical | 3-5 d | 13 | 0,662 | -0,134 | -0,638 | 0,450  | -0,4864 | -2,8691 | 1,8963  | 0,9539  |
| <b>CD91</b>     | Immune modulator                           | nonclassical | 3-5 d | 13 | 0,031 | 0,599  | 0,071  | 0,865  | 1,8976  | 0,2130  | 3,5822  | -1,4051 |
| <b>CX3CR1</b>   | Anti-inflammatory                          | nonclassical | 3-5 d | 13 | 0,041 | -0,573 | -0,854 | -0,033 | -1,6888 | -3,2906 | -0,0870 | 2,0235  |
| <b>GAPDH</b>    | Housekeeping                               | nonclassical | 3-5 d | 13 | 0,812 | -0,073 | -0,600 | 0,498  | -0,2569 | -2,5773 | 2,0634  | 0,1920  |
| <b>IFITM2</b>   | interferon response and antiviral immunity | nonclassical | 3-5 d | 13 | 0,646 | -0,141 | -0,642 | 0,444  | -0,3564 | -2,0158 | 1,3031  | 0,4414  |
| <b>IL10</b>     | Anti-inflammatory                          | nonclassical | 3-5 d | 12 | 0,016 | -0,675 | -0,900 | -0,166 | -1,0120 | -1,7907 | -0,2332 | 0,1103  |
| <b>IL1B</b>     | Pro-inflammatory                           | nonclassical | 3-5 d | 13 | 0,820 | 0,070  | -0,500 | 0,598  | 0,2829  | -2,3885 | 2,9544  | -0,6128 |
| <b>MARCO</b>    | Phagocytotic activity, scavenger receptor  | nonclassical | 3-5 d | 13 | 0,719 | 0,111  | -0,469 | 0,624  | 0,4394  | -2,1781 | 3,0568  | -0,7890 |
| <b>SIGLEC10</b> | Anti-inflammatory                          | nonclassical | 3-5 d | 13 | 0,140 | -0,432 | -0,794 | 0,156  | -1,2754 | -3,0410 | 0,4902  | 1,6937  |
| <b>SLC24A4</b>  | cellular calcium ion homeostasis           | nonclassical | 3-5 d | 13 | 0,083 | 0,499  | -0,072 | 0,824  | 1,1294  | -0,1723 | 2,4311  | -0,8900 |
| <b>STAT6</b>    | Anti-inflammatory                          | nonclassical | 3-5 d | 13 | 0,282 | -0,323 | -0,742 | 0,278  | -1,0046 | -2,9595 | 0,9504  | 1,1559  |
| <b>TGFB1</b>    | Anti-inflammatory, immune modulator        | nonclassical | 3-5 d | 13 | 0,132 | -0,440 | -0,798 | 0,146  | -1,2806 | -3,0148 | 0,4536  | 1,0979  |
| <b>TGM2</b>     | Immune modulator                           | nonclassical | 3-5 d | 13 | 0,340 | 0,288  | -0,313 | 0,724  | 0,9965  | -1,2031 | 3,1960  | -1,0923 |
| <b>TLR8</b>     | Pro-inflammatory                           | nonclassical | 3-5 d | 13 | 0,911 | -0,035 | -0,575 | 0,526  | -0,0893 | -1,8008 | 1,6222  | 0,0953  |
| <b>TNFA</b>     | Pro-inflammatory                           | nonclassical | 3-5 d | 13 | 0,988 | 0,005  | -0,548 | 0,554  | 0,0201  | -2,8107 | 2,8509  | 0,1044  |
| <b>TREM1</b>    | Pro-inflammatory                           | nonclassical | 3-5 d | 13 | 0,350 | 0,282  | -0,318 | 0,721  | 0,7727  | -0,9707 | 2,5161  | -1,2200 |
| <b>TSPO</b>     | Anti-inflammatory                          | nonclassical | 3-5 d | 13 | 0,838 | -0,063 | -0,593 | 0,505  | -0,1740 | -2,0011 | 1,6530  | -0,0799 |
