# Supplementary material for: Time-dependent changes in monocyte subsets and gene expression patterns are associated with long-term recovery in patients with ischemic stroke
Source: Research Square preprint supplement (doi:10.21203/rs.3.rs-8980124/v1), 2026-03-16
Supplement: Supplementary file 5 [file 919a78a8f895ac0a307dd9d4.pdf]

### NIHSS of patients (FACS) - Recovery vs No recovery

|                    | Below threshold? | P value  | Mean of Lack of recovery | Mean of Spontaneous recovery | Difference | SE of difference | t ratio | df    |
|--------------------|------------------|----------|--------------------------|------------------------------|------------|------------------|---------|-------|
| <b>24 hours</b>    | No               | 0.882994 | 6.105                    | 6.389                        | -0.2836    | 1.913            | 0.1483  | 35.00 |
| <b>3-5 days</b>    | Yes              | 0.013532 | 4.471                    | 1.833                        | 2.637      | 1.011            | 2.609   | 33.00 |
| <b>3 months</b>    | No               | 0.072941 | 4.167                    | 1.235                        | 2.931      | 1.571            | 1.866   | 27.00 |
| <b>&gt; 1 year</b> | Yes              | 0.006876 | 4.167                    | 0.3750                       | 3.792      | 1.292            | 2.936   | 26.00 |

### NIHSS of patients (Fluidigm) - Recovery vs No recovery

|                    | Below threshold? | P value  | Mean of Lack of recovery | Mean of Spontaneous recovery | Difference | SE of difference | t ratio | df    |
|--------------------|------------------|----------|--------------------------|------------------------------|------------|------------------|---------|-------|
| <b>24 hours</b>    | No               | 0.657133 | 5.500                    | 4.714                        | 0.7857     | 1.735            | 0.4529  | 15.00 |
| <b>3-5 days</b>    | No               | 0.245107 | 4.300                    | 2.429                        | 1.871      | 1.547            | 1.210   | 15.00 |
| <b>3 months</b>    | No               | 0.602566 | 1.875                    | 1.333                        | 0.5417     | 1.013            | 0.5348  | 12.00 |
| <b>&gt; 1 year</b> | Yes              | 0.037239 | 2.429                    | 0.6000                       | 1.829      | 0.7615           | 2.401   | 10.00 |
