# Supplementary material for: Time-dependent changes in monocyte subsets and gene expression patterns are associated with long-term recovery in patients with ischemic stroke
Source: Research Square preprint supplement (doi:10.21203/rs.3.rs-8980124/v1), 2026-03-16
Supplement: Supplementary file 6 [file 94b86516949f187a3e6830a2.pdf]

**Linear regression analysis (Pearson) for gene expression with NIHSS score**

| Gene            | Function                                   | Subpopulation | Time after stroke | N  | p-value | Correlation coefficient (r) | Correlation coefficient 95% confidence interval |        | Regression coefficient | Regression coefficient 95% confidence interval |         | Intercept |
|-----------------|--------------------------------------------|---------------|-------------------|----|---------|-----------------------------|-------------------------------------------------|--------|------------------------|------------------------------------------------|---------|-----------|
| <b>ACTB</b>     | Housekeeping                               | all           | 24 h              | 15 | 0,681   | 0,116                       | -0,421                                          | 0,593  | 0,0247                 | -0,1021                                        | 0,1515  | -0,526    |
| <b>ANXA1</b>    | Anti-inflammatory                          | all           | 24 h              | 15 | 0,559   | -0,164                      | -0,624                                          | 0,380  | -0,0472                | -0,2172                                        | 0,1228  | 0,092     |
| <b>B2M</b>      | Housekeeping                               | all           | 24 h              | 15 | 0,063   | -0,491                      | -0,802                                          | 0,028  | -0,0718                | -0,1482                                        | 0,0045  | 0,090     |
| <b>BDNF</b>     | Neuroplasticity                            | all           | 24 h              | 15 | 0,558   | -0,165                      | -0,624                                          | 0,380  | -0,0200                | -0,0919                                        | 0,0518  | 0,034     |
| <b>CCR2</b>     | Monocyte infiltration                      | all           | 24 h              | 15 | 0,094   | -0,447                      | -0,781                                          | 0,084  | -0,0594                | -0,1306                                        | 0,0117  | 0,634     |
| <b>CD11B</b>    | Monocyte adhesion and migration            | all           | 24 h              | 15 | 0,815   | 0,066                       | -0,462                                          | 0,559  | 0,0057                 | -0,0458                                        | 0,0571  | 0,501     |
| <b>CD11C</b>    | Monocyte adhesion                          | all           | 24 h              | 15 | 0,900   | -0,036                      | -0,538                                          | 0,486  | -0,0086                | -0,1539                                        | 0,1367  | -0,595    |
| <b>CD169</b>    | Pro-inflammatory                           | all           | 24 h              | 15 | 0,441   | 0,215                       | -0,334                                          | 0,655  | 0,0293                 | -0,0502                                        | 0,1088  | 0,105     |
| <b>CD31</b>     | Anti-inflammatory                          | all           | 24 h              | 15 | 0,117   | -0,423                      | -0,768                                          | 0,115  | -0,0564                | -0,1290                                        | 0,0161  | -0,073    |
| <b>CD32</b>     | Immune modulator                           | all           | 24 h              | 15 | 0,801   | -0,071                      | -0,563                                          | 0,458  | -0,0165                | -0,1545                                        | 0,1215  | -0,035    |
| <b>CD33</b>     | Anti-inflammatory                          | all           | 24 h              | 15 | 0,290   | -0,293                      | -0,700                                          | 0,258  | -0,0490                | -0,1449                                        | 0,0469  | 0,639     |
| <b>CD36</b>     | Pro-inflammatory                           | all           | 24 h              | 15 | 0,910   | -0,032                      | -0,535                                          | 0,488  | -0,0032                | -0,0632                                        | 0,0568  | 0,683     |
| <b>CD38</b>     | Immune modulator                           | all           | 24 h              | 15 | 0,861   | -0,050                      | -0,548                                          | 0,475  | -0,0089                | -0,1163                                        | 0,0985  | -0,047    |
| <b>CD40</b>     | Pro-inflammatory                           | all           | 24 h              | 15 | 0,157   | 0,384                       | -0,159                                          | 0,749  | 0,1219                 | -0,0536                                        | 0,2974  | -1,325    |
| <b>CD64</b>     | Pro-inflammatory                           | all           | 24 h              | 15 | 0,203   | 0,348                       | -0,200                                          | 0,730  | 0,0608                 | -0,0373                                        | 0,1589  | -0,171    |
| <b>CD86</b>     | Pro-inflammatory                           | all           | 24 h              | 15 | 0,982   | 0,006                       | -0,508                                          | 0,517  | 0,0011                 | -0,0989                                        | 0,1010  | -0,386    |
| <b>CD91</b>     | Immune modulator                           | all           | 24 h              | 15 | 0,541   | 0,171                       | -0,374                                          | 0,628  | 0,0261                 | -0,0639                                        | 0,1162  | 0,267     |
| <b>CX3CR1</b>   | Anti-inflammatory                          | all           | 24 h              | 15 | 0,987   | -0,005                      | -0,516                                          | 0,509  | -0,0007                | -0,0911                                        | 0,0897  | -0,454    |
| <b>GAPDH</b>    | Housekeeping                               | all           | 24 h              | 15 | 0,604   | 0,146                       | -0,396                                          | 0,612  | 0,038                  | -0,1169                                        | 0,1931  | -0,4486   |
| <b>IFITM2</b>   | interferon response and antiviral immunity | all           | 24 h              | 15 | 0,482   | 0,197                       | -0,351                                          | 0,644  | 0,044                  | -0,0871                                        | 0,1747  | -0,3894   |
| <b>IL10</b>     | Anti-inflammatory                          | all           | 24 h              | 15 | 0,922   | -0,028                      | -0,532                                          | 0,492  | -0,008                 | -0,1764                                        | 0,1609  | 0,3441    |
| <b>IL1B</b>     | Pro-inflammatory                           | all           | 24 h              | 15 | 0,866   | -0,048                      | -0,546                                          | 0,476  | -0,008                 | -0,1121                                        | 0,0956  | 0,0913    |
| <b>MARCO</b>    | Phagocytotic activity, scavenger receptor  | all           | 24 h              | 15 | 0,372   | 0,248                       | -0,303                                          | 0,675  | 0,070                  | -0,0937                                        | 0,2338  | -0,4235   |
| <b>SIGLEC10</b> | Anti-inflammatory                          | all           | 24 h              | 15 | 0,119   | 0,420                       | -0,118                                          | 0,767  | 0,100                  | -0,0294                                        | 0,2287  | -1,2105   |
| <b>SLC24A4</b>  | cellular calcium ion homeostasis           | all           | 24 h              | 15 | 0,389   | -0,240                      | -0,670                                          | 0,310  | -0,025                 | -0,0870                                        | 0,0362  | 0,2950    |
| <b>STAT6</b>    | Anti-inflammatory                          | all           | 24 h              | 15 | 0,831   | -0,060                      | -0,555                                          | 0,466  | -0,008                 | -0,0845                                        | 0,0691  | -0,2302   |
| <b>TGFB1</b>    | Anti-inflammatory, immune modulator        | all           | 24 h              | 15 | 0,250   | -0,317                      | -0,713                                          | 0,233  | -0,049                 | -0,1365                                        | 0,0388  | -0,0363   |
| <b>TGM2</b>     | Immune modulator                           | all           | 24 h              | 15 | 0,297   | 0,288                       | -0,263                                          | 0,698  | 0,074                  | -0,0734                                        | 0,2217  | -0,9598   |
| <b>TLR8</b>     | Pro-inflammatory                           | all           | 24 h              | 15 | 0,168   | 0,376                       | -0,169                                          | 0,745  | 0,103                  | -0,0492                                        | 0,2552  | -1,1281   |
| <b>TNFA</b>     | Pro-inflammatory                           | all           | 24 h              | 15 | 0,120   | 0,419                       | -0,119                                          | 0,767  | 0,122                  | -0,0364                                        | 0,2805  | -1,0979   |
| <b>TREM1</b>    | Pro-inflammatory                           | all           | 24 h              | 15 | 0,772   | -0,082                      | -0,570                                          | 0,449  | -0,006                 | -0,0523                                        | 0,0397  | 0,7267    |
| <b>TSPO</b>     | Anti-inflammatory                          | all           | 24 h              | 15 | 0,004   | -0,696                      | -0,891                                          | -0,285 | -0,106                 | -0,1711                                        | -0,0404 | 1,0563    |
| <b>ACTB</b>     | Housekeeping                               | classical     | 24 h              | 15 | 0,903   | 0,035                       | -0,486                                          | 0,537  | 0,004                  | -0,0703                                        | 0,0789  | -0,2646   |
| <b>ANXA1</b>    | Anti-inflammatory                          | classical     | 24 h              | 15 | 0,519   | -0,181                      | -0,634                                          | 0,365  | -0,053                 | -0,2264                                        | 0,1200  | 0,1742    |

|                 |                                            |           |      |    |       |        |        |        |        |         |         |         |
|-----------------|--------------------------------------------|-----------|------|----|-------|--------|--------|--------|--------|---------|---------|---------|
| <b>B2M</b>      | Housekeeping                               | classical | 24 h | 15 | 0,216 | -0,339 | -0,725 | 0,209  | -0,037 | -0,0974 | 0,0242  | -0,0147 |
| <b>BDNF</b>     | Neuroplasticity                            | classical | 24 h | 15 | 0,446 | -0,213 | -0,654 | 0,336  | -0,033 | -0,1252 | 0,0584  | 0,3630  |
| <b>CCR2</b>     | Monocyte infiltration                      | classical | 24 h | 15 | 0,219 | -0,338 | -0,725 | 0,211  | -0,040 | -0,1057 | 0,0266  | 0,5590  |
| <b>CD11B</b>    | Monocyte adhesion and migration            | classical | 24 h | 15 | 0,056 | -0,502 | -0,807 | 0,014  | -0,053 | -0,1072 | 0,0017  | 0,5303  |
| <b>CD11C</b>    | Monocyte adhesion                          | classical | 24 h | 15 | 0,639 | 0,132  | -0,408 | 0,603  | 0,017  | -0,0600 | 0,0944  | -0,7970 |
| <b>CD169</b>    | Pro-inflammatory                           | classical | 24 h | 15 | 0,501 | 0,188  | -0,358 | 0,639  | 0,026  | -0,0557 | 0,1081  | 0,2366  |
| <b>CD31</b>     | Anti-inflammatory                          | classical | 24 h | 15 | 0,464 | -0,205 | -0,649 | 0,344  | -0,021 | -0,0822 | 0,0396  | -0,3535 |
| <b>CD32</b>     | Immune modulator                           | classical | 24 h | 15 | 0,722 | 0,100  | -0,434 | 0,583  | 0,015  | -0,0720 | 0,1012  | 0,0414  |
| <b>CD33</b>     | Anti-inflammatory                          | classical | 24 h | 15 | 0,436 | -0,218 | -0,657 | 0,332  | -0,034 | -0,1246 | 0,0570  | 0,2174  |
| <b>CD36</b>     | Pro-inflammatory                           | classical | 24 h | 15 | 0,271 | 0,304  | -0,247 | 0,706  | 0,031  | -0,0275 | 0,0902  | 0,3371  |
| <b>CD38</b>     | Immune modulator                           | classical | 24 h | 15 | 0,670 | 0,120  | -0,418 | 0,596  | 0,020  | -0,0809 | 0,1217  | -0,1837 |
| <b>CD40</b>     | Pro-inflammatory                           | classical | 24 h | 15 | 0,650 | 0,128  | -0,411 | 0,601  | 0,026  | -0,0959 | 0,1485  | -0,7367 |
| <b>CD64</b>     | Pro-inflammatory                           | classical | 24 h | 15 | 0,317 | 0,277  | -0,274 | 0,691  | 0,026  | -0,0281 | 0,0804  | 0,0843  |
| <b>CD86</b>     | Pro-inflammatory                           | classical | 24 h | 15 | 0,505 | -0,187 | -0,638 | 0,360  | -0,021 | -0,0875 | 0,0453  | -0,6788 |
| <b>CD91</b>     | Immune modulator                           | classical | 24 h | 15 | 0,852 | -0,053 | -0,550 | 0,472  | -0,010 | -0,1191 | 0,0998  | 0,2786  |
| <b>CX3CR1</b>   | Anti-inflammatory                          | classical | 24 h | 14 | 0,983 | 0,006  | -0,526 | 0,535  | 0,001  | -0,0499 | 0,0509  | -0,3911 |
| <b>GAPDH</b>    | Housekeeping                               | classical | 24 h | 15 | 0,365 | 0,252  | -0,299 | 0,677  | 0,048  | -0,0627 | 0,1591  | -0,2513 |
| <b>IFITM2</b>   | interferon response and antiviral immunity | classical | 24 h | 15 | 0,384 | 0,242  | -0,308 | 0,671  | 0,038  | -0,0534 | 0,1298  | -0,1733 |
| <b>IL10</b>     | Anti-inflammatory                          | classical | 24 h | 15 | 0,558 | 0,164  | -0,380 | 0,624  | 0,040  | -0,1034 | 0,1832  | 0,0197  |
| <b>IL1B</b>     | Pro-inflammatory                           | classical | 24 h | 15 | 0,735 | 0,096  | -0,438 | 0,579  | 0,009  | -0,0475 | 0,0657  | 0,2945  |
| <b>MARCO</b>    | Phagocytotic activity, scavenger receptor  | classical | 24 h | 15 | 0,450 | 0,211  | -0,338 | 0,653  | 0,061  | -0,1077 | 0,2291  | -0,6164 |
| <b>SIGLEC10</b> | Anti-inflammatory                          | classical | 24 h | 15 | 0,610 | 0,143  | -0,398 | 0,611  | 0,023  | -0,0714 | 0,1170  | -0,8846 |
| <b>SLC24A4</b>  | cellular calcium ion homeostasis           | classical | 24 h | 15 | 0,973 | 0,009  | -0,505 | 0,519  | 0,001  | -0,0753 | 0,0777  | 0,2028  |
| <b>STAT6</b>    | Anti-inflammatory                          | classical | 24 h | 15 | 0,719 | 0,102  | -0,433 | 0,583  | 0,014  | -0,0693 | 0,0978  | -0,4285 |
| <b>TGFB1</b>    | Anti-inflammatory, immunomodul             | classical | 24 h | 15 | 0,771 | 0,082  | -0,449 | 0,570  | 0,010  | -0,0658 | 0,0868  | -0,4280 |
| <b>TGM2</b>     | Immune modulator                           | classical | 24 h | 15 | 0,578 | 0,156  | -0,387 | 0,619  | 0,034  | -0,0946 | 0,1626  | -0,5847 |
| <b>TLR8</b>     | Pro-inflammatory                           | classical | 24 h | 15 | 0,998 | -0,001 | -0,513 | 0,512  | 0,000  | -0,1117 | 0,1114  | -0,3397 |
| <b>TNFA</b>     | Pro-inflammatory                           | classical | 24 h | 15 | 0,290 | 0,293  | -0,258 | 0,700  | 0,072  | -0,0687 | 0,2120  | -0,9418 |
| <b>TREM1</b>    | Pro-inflammatory                           | classical | 24 h | 15 | 0,482 | -0,197 | -0,644 | 0,351  | -0,018 | -0,0737 | 0,0367  | 0,7926  |
| <b>TSPO</b>     | Anti-inflammatory                          | classical | 24 h | 15 | 0,003 | -0,708 | -0,895 | -0,306 | -0,095 | -0,1519 | -0,0382 | 0,9573  |
| <b>ACTB</b>     | Housekeeping                               | intermed  | 24 h | 15 | 0,974 | 0,009  | -0,506 | 0,519  | 0,002  | -0,1297 | 0,1337  | 0,1204  |
| <b>ANXA1</b>    | Anti-inflammatory                          | intermed  | 24 h | 15 | 0,777 | -0,080 | -0,569 | 0,451  | -0,024 | -0,2016 | 0,1541  | -0,3742 |
| <b>B2M</b>      | Housekeeping                               | intermed  | 24 h | 15 | 0,554 | -0,166 | -0,625 | 0,378  | -0,026 | -0,1179 | 0,0662  | 0,1354  |
| <b>BDNF</b>     | Neuroplasticity                            | intermed  | 24 h | 15 | 0,208 | 0,345  | -0,203 | 0,728  | 0,044  | -0,0276 | 0,1150  | 0,0410  |
| <b>CCR2</b>     | Monocyte infiltration                      | intermed  | 24 h | 15 | 0,875 | 0,045  | -0,479 | 0,544  | 0,012  | -0,1528 | 0,1774  | -0,5802 |
| <b>CD11B</b>    | Monocyte adhesion; migration               | intermed  | 24 h | 15 | 0,469 | -0,202 | -0,648 | 0,346  | -0,026 | -0,1018 | 0,0496  | 0,3199  |
| <b>CD11C</b>    | Monocyte adhesion                          | intermed  | 24 h | 15 | 0,858 | 0,051  | -0,474 | 0,549  | 0,008  | -0,0880 | 0,1042  | -0,0378 |
| <b>CD169</b>    | Pro-inflammatory                           | intermed  | 24 h | 15 | 0,424 | 0,223  | -0,326 | 0,660  | 0,051  | -0,0824 | 0,1844  | -0,3273 |

|                 |                                            |          |      |    |       |        |        |       |        |         |        |         |
|-----------------|--------------------------------------------|----------|------|----|-------|--------|--------|-------|--------|---------|--------|---------|
| <b>CD31</b>     | Anti-inflammatory                          | intermed | 24 h | 15 | 0,902 | 0,035  | -0,486 | 0,537 | 0,006  | -0,0906 | 0,1017 | 0,1496  |
| <b>CD32</b>     | Immune modulator                           | intermed | 24 h | 15 | 0,486 | 0,195  | -0,353 | 0,643 | 0,043  | -0,0861 | 0,1715 | -0,1408 |
| <b>CD33</b>     | Anti-inflammatory                          | intermed | 24 h | 15 | 0,309 | -0,282 | -0,694 | 0,270 | -0,060 | -0,1817 | 0,0623 | 0,6285  |
| <b>CD36</b>     | Pro-inflammatory                           | intermed | 24 h | 15 | 0,942 | 0,020  | -0,497 | 0,527 | 0,003  | -0,0828 | 0,0887 | 0,1408  |
| <b>CD38</b>     | Immune modulator                           | intermed | 24 h | 15 | 0,636 | 0,133  | -0,407 | 0,604 | 0,014  | -0,0471 | 0,0743 | 0,3008  |
| <b>CD40</b>     | Pro-inflammatory                           | intermed | 24 h | 15 | 0,308 | 0,282  | -0,269 | 0,694 | 0,055  | -0,0570 | 0,1668 | -0,1429 |
| <b>CD64</b>     | Pro-inflammatory                           | intermed | 24 h | 15 | 0,322 | 0,274  | -0,277 | 0,690 | 0,052  | -0,0572 | 0,1611 | -0,2259 |
| <b>CD86</b>     | Pro-inflammatory                           | intermed | 24 h | 15 | 0,757 | -0,087 | -0,574 | 0,445 | -0,014 | -0,1122 | 0,0835 | 0,2272  |
| <b>CD91</b>     | Immune modulator                           | intermed | 24 h | 15 | 0,893 | -0,038 | -0,540 | 0,484 | -0,008 | -0,1373 | 0,1209 | 0,3166  |
| <b>CX3CR1</b>   | Anti-inflammatory                          | intermed | 24 h | 15 | 0,951 | -0,018 | -0,525 | 0,499 | -0,003 | -0,0953 | 0,0899 | 0,2284  |
| <b>GAPDH</b>    | Housekeeping                               | intermed | 24 h | 15 | 0,168 | 0,375  | -0,170 | 0,744 | 0,079  | -0,0381 | 0,1962 | -0,4202 |
| <b>IFITM2</b>   | interferon response and antiviral immunity | intermed | 24 h | 15 | 0,283 | 0,297  | -0,254 | 0,702 | 0,056  | -0,0525 | 0,1654 | -0,3346 |
| <b>IL10</b>     | Anti-inflammatory                          | intermed | 24 h | 15 | 0,917 | -0,030 | -0,534 | 0,490 | -0,005 | -0,1161 | 0,1051 | 0,4754  |
| <b>IL1B</b>     | Pro-inflammatory                           | intermed | 24 h | 14 | 0,364 | 0,263  | -0,311 | 0,696 | 0,027  | -0,0349 | 0,0883 | 0,2826  |
| <b>MARCO</b>    | Phagocytotic activity, scavenger receptor  | intermed | 24 h | 15 | 0,616 | 0,141  | -0,400 | 0,609 | 0,042  | -0,1355 | 0,2202 | -0,2195 |
| <b>SIGLEC10</b> | Anti-inflammatory                          | intermed | 24 h | 15 | 0,622 | 0,139  | -0,402 | 0,608 | 0,023  | -0,0753 | 0,1214 | 0,0139  |
| <b>SLC24A4</b>  | cellular calcium ion homeostasis           | intermed | 24 h | 15 | 0,915 | 0,030  | -0,490 | 0,534 | 0,006  | -0,1186 | 0,1311 | 0,2609  |
| <b>STAT6</b>    | Anti-inflammatory                          | intermed | 24 h | 15 | 0,293 | 0,291  | -0,260 | 0,699 | 0,043  | -0,0418 | 0,1279 | -0,1917 |
| <b>TGFB1</b>    | Anti-inflammatory, immune modulator        | intermed | 24 h | 15 | 0,945 | -0,019 | -0,526 | 0,498 | -0,003 | -0,0806 | 0,0755 | -0,0867 |
| <b>TGM2</b>     | Immune modulator                           | intermed | 24 h | 15 | 0,391 | 0,239  | -0,311 | 0,669 | 0,032  | -0,0462 | 0,1107 | 0,3343  |
| <b>TLR8</b>     | Pro-inflammatory                           | intermed | 24 h | 15 | 0,864 | 0,048  | -0,476 | 0,547 | 0,009  | -0,1002 | 0,1177 | -0,2372 |
| <b>TNFA</b>     | Pro-inflammatory                           | intermed | 24 h | 15 | 0,300 | 0,287  | -0,264 | 0,697 | 0,071  | -0,0709 | 0,2127 | -0,3597 |
| <b>TREM1</b>    | Pro-inflammatory                           | intermed | 24 h | 15 | 0,775 | 0,081  | -0,450 | 0,569 | 0,009  | -0,0556 | 0,0730 | 0,0593  |
| <b>TSPO</b>     | Anti-inflammatory                          | intermed | 24 h | 15 | 0,217 | -0,338 | -0,725 | 0,210 | -0,061 | -0,1617 | 0,0404 | 0,5236  |
| <b>ACTB</b>     | Housekeeping                               | nonclass | 24 h | 15 | 0,996 | -0,001 | -0,513 | 0,511 | 0,000  | -0,1363 | 0,1358 | 0,3267  |
| <b>ANXA1</b>    | Anti-inflammatory                          | nonclass | 24 h | 15 | 0,844 | -0,056 | -0,552 | 0,470 | -0,017 | -0,1987 | 0,1648 | -0,1665 |
| <b>B2M</b>      | Housekeeping                               | nonclass | 24 h | 15 | 0,188 | -0,359 | -0,736 | 0,188 | -0,046 | -0,1175 | 0,0256 | 0,5525  |
| <b>BDNF</b>     | Neuroplasticity                            | nonclass | 24 h | 15 | 0,468 | 0,203  | -0,345 | 0,648 | 0,046  | -0,0875 | 0,1801 | 0,4963  |
| <b>CCR2</b>     | Monocyte infiltration                      | nonclass | 24 h | 15 | 0,383 | 0,243  | -0,308 | 0,672 | 0,069  | -0,0968 | 0,2356 | -1,1448 |
| <b>CD11B</b>    | Monocyte adhesion and migration            | nonclass | 24 h | 15 | 0,759 | -0,087 | -0,573 | 0,445 | -0,014 | -0,1139 | 0,0850 | -0,5480 |
| <b>CD11C</b>    | Monocyte adhesion                          | nonclass | 24 h | 15 | 0,457 | -0,208 | -0,651 | 0,341 | -0,030 | -0,1148 | 0,0547 | 0,8074  |
| <b>CD169</b>    | Pro-inflammatory                           | nonclass | 24 h | 15 | 0,899 | 0,036  | -0,485 | 0,538 | 0,007  | -0,1178 | 0,1327 | -1,1119 |
| <b>CD31</b>     | Anti-inflammatory                          | nonclass | 24 h | 15 | 0,471 | -0,202 | -0,647 | 0,346 | -0,026 | -0,1002 | 0,0489 | 1,0035  |
| <b>CD32</b>     | Immune modulator                           | nonclass | 24 h | 15 | 0,094 | 0,448  | -0,084 | 0,781 | 0,118  | -0,0233 | 0,2598 | -0,5856 |
| <b>CD33</b>     | Anti-inflammatory                          | nonclass | 24 h | 15 | 0,714 | -0,103 | -0,585 | 0,432 | -0,023 | -0,1526 | 0,1075 | 0,5664  |
| <b>CD36</b>     | Pro-inflammatory                           | nonclass | 24 h | 15 | 0,631 | 0,135  | -0,405 | 0,606 | 0,027  | -0,0910 | 0,1447 | -0,8582 |
| <b>CD38</b>     | Immune modulator                           | nonclass | 24 h | 15 | 0,470 | -0,202 | -0,647 | 0,346 | -0,063 | -0,2466 | 0,1203 | -0,3982 |
| <b>CD40</b>     | Pro-inflammatory                           | nonclass | 24 h | 15 | 0,170 | 0,374  | -0,172 | 0,744 | 0,109  | -0,0533 | 0,2715 | -0,6634 |

|                 |                                            |          |       |    |       |        |        |        |        |         |         |         |
|-----------------|--------------------------------------------|----------|-------|----|-------|--------|--------|--------|--------|---------|---------|---------|
| <b>CD64</b>     | Pro-inflammatory                           | nonclass | 24 h  | 15 | 0,244 | 0,320  | -0,229 | 0,715  | 0,089  | -0,0687 | 0,2469  | -0,9399 |
| <b>CD86</b>     | Pro-inflammatory                           | nonclass | 24 h  | 15 | 0,782 | -0,078 | -0,568 | 0,452  | -0,013 | -0,1115 | 0,0857  | 1,0254  |
| <b>CD91</b>     | Immune modulator                           | nonclass | 24 h  | 15 | 0,712 | 0,104  | -0,431 | 0,585  | 0,023  | -0,1101 | 0,1567  | 0,1438  |
| <b>CX3CR1</b>   | Anti-inflammatory                          | nonclass | 24 h  | 15 | 0,992 | -0,003 | -0,514 | 0,510  | 0,000  | -0,1045 | 0,1036  | 0,6753  |
| <b>GAPDH</b>    | Housekeeping                               | nonclass | 24 h  | 15 | 0,234 | 0,327  | -0,223 | 0,719  | 0,083  | -0,0608 | 0,2269  | -0,4491 |
| <b>IFITM2</b>   | interferon response and antiviral immunity | nonclass | 24 h  | 15 | 0,060 | 0,496  | -0,021 | 0,804  | 0,087  | -0,0042 | 0,1784  | -0,2289 |
| <b>IL10</b>     | Anti-inflammatory                          | nonclass | 24 h  | 15 | 0,166 | 0,377  | -0,168 | 0,745  | 0,081  | -0,0383 | 0,2006  | -0,6187 |
| <b>IL1B</b>     | Pro-inflammatory                           | nonclass | 24 h  | 15 | 0,795 | 0,073  | -0,456 | 0,564  | 0,014  | -0,1000 | 0,1279  | -0,2587 |
| <b>MARCO</b>    | Phagocytotic activity, scavenger receptor  | nonclass | 24 h  | 15 | 0,082 | 0,463  | -0,064 | 0,788  | 0,115  | -0,0168 | 0,2466  | -1,0707 |
| <b>SIGLEC10</b> | Anti-inflammatory                          | nonclass | 24 h  | 14 | 0,677 | 0,122  | -0,436 | 0,613  | 0,013  | -0,0520 | 0,0773  | 0,7002  |
| <b>SLC24A4</b>  | cellular calcium ion homeostasis           | nonclass | 24 h  | 15 | 0,803 | -0,071 | -0,562 | 0,458  | -0,013 | -0,1256 | 0,0991  | 0,1267  |
| <b>STAT6</b>    | Anti-inflammatory                          | nonclass | 24 h  | 15 | 0,707 | 0,106  | -0,430 | 0,586  | 0,024  | -0,1097 | 0,1572  | 0,3300  |
| <b>TGFB1</b>    | Anti-inflammatory, immune modulator        | nonclass | 24 h  | 15 | 0,763 | -0,085 | -0,572 | 0,447  | -0,008 | -0,0617 | 0,0463  | 0,2863  |
| <b>TGM2</b>     | Immune modulator                           | nonclass | 24 h  | 15 | 0,063 | 0,491  | -0,028 | 0,802  | 0,123  | -0,0076 | 0,2546  | -0,8972 |
| <b>TLR8</b>     | Pro-inflammatory                           | nonclass | 24 h  | 14 | 0,032 | 0,574  | 0,063  | 0,847  | 0,060  | 0,0062  | 0,1130  | -0,3410 |
| <b>TNFA</b>     | Pro-inflammatory                           | nonclass | 24 h  | 14 | 0,234 | 0,340  | -0,232 | 0,738  | 0,052  | -0,0388 | 0,1436  | 0,1176  |
| <b>TREM1</b>    | Pro-inflammatory                           | nonclass | 24 h  | 15 | 0,682 | 0,115  | -0,422 | 0,593  | 0,016  | -0,0663 | 0,0983  | -0,5410 |
| <b>TSPO</b>     | Anti-inflammatory                          | nonclass | 24 h  | 15 | 0,652 | -0,127 | -0,600 | 0,412  | -0,025 | -0,1416 | 0,0918  | 0,1092  |
| <b>ACTB</b>     | Housekeeping                               | all      | 3-5 d | 15 | 0,515 | 0,183  | -0,364 | 0,635  | 0,037  | -0,0822 | 0,1561  | -0,2838 |
| <b>ANXA1</b>    | Anti-inflammatory                          | all      | 3-5 d | 15 | 0,866 | -0,048 | -0,546 | 0,476  | -0,014 | -0,1886 | 0,1608  | -0,0052 |
| <b>B2M</b>      | Housekeeping                               | all      | 3-5 d | 14 | 0,056 | 0,522  | -0,012 | 0,824  | 0,030  | -0,0008 | 0,0603  | -0,2102 |
| <b>BDNF</b>     | Neuroplasticity                            | all      | 3-5 d | 15 | 0,269 | -0,305 | -0,707 | 0,246  | -0,042 | -0,1217 | 0,0369  | 0,2044  |
| <b>CCR2</b>     | Monocyte infiltration                      | all      | 3-5 d | 15 | 0,736 | 0,095  | -0,439 | 0,579  | 0,019  | -0,1027 | 0,1417  | 0,1535  |
| <b>CD11B</b>    | Monocyte adhesion and migration            | all      | 3-5 d | 15 | 0,430 | 0,220  | -0,329 | 0,658  | 0,021  | -0,0353 | 0,0781  | 0,4472  |
| <b>CD11C</b>    | Monocyte adhesion                          | all      | 3-5 d | 15 | 0,804 | 0,070  | -0,459 | 0,562  | 0,011  | -0,0863 | 0,1092  | -0,3469 |
| <b>CD169</b>    | Pro-inflammatory                           | all      | 3-5 d | 15 | 0,376 | -0,247 | -0,674 | 0,304  | -0,036 | -0,1218 | 0,0492  | 0,5232  |
| <b>CD31</b>     | Anti-inflammatory                          | all      | 3-5 d | 15 | 0,860 | 0,050  | -0,474 | 0,548  | 0,006  | -0,0638 | 0,0755  | -0,3201 |
| <b>CD32</b>     | Immune modulator                           | all      | 3-5 d | 15 | 0,651 | -0,127 | -0,600 | 0,412  | -0,025 | -0,1423 | 0,0921  | 0,0139  |
| <b>CD33</b>     | Anti-inflammatory                          | all      | 3-5 d | 15 | 0,301 | -0,286 | -0,696 | 0,265  | -0,032 | -0,0972 | 0,0325  | 0,4422  |
| <b>CD36</b>     | Pro-inflammatory                           | all      | 3-5 d | 15 | 0,654 | 0,126  | -0,413 | 0,600  | 0,016  | -0,0582 | 0,0896  | 0,6879  |
| <b>CD38</b>     | Immune modulator                           | all      | 3-5 d | 15 | 0,585 | -0,153 | -0,617 | 0,390  | -0,033 | -0,1627 | 0,0958  | -0,0350 |
| <b>CD40</b>     | Pro-inflammatory                           | all      | 3-5 d | 15 | 0,221 | -0,336 | -0,724 | 0,213  | -0,094 | -0,2509 | 0,0636  | 0,0479  |
| <b>CD64</b>     | Pro-inflammatory                           | all      | 3-5 d | 15 | 0,473 | 0,201  | -0,347 | 0,647  | 0,027  | -0,0522 | 0,1066  | 0,1532  |
| <b>CD86</b>     | Pro-inflammatory                           | all      | 3-5 d | 15 | 0,010 | -0,642 | -0,869 | -0,194 | -0,089 | -0,1525 | -0,0254 | -0,0063 |
| <b>CD91</b>     | Immune modulator                           | all      | 3-5 d | 15 | 0,955 | -0,016 | -0,524 | 0,500  | -0,003 | -0,1080 | 0,1024  | 0,3214  |
| <b>CX3CR1</b>   | Anti-inflammatory                          | all      | 3-5 d | 15 | 0,969 | 0,011  | -0,504 | 0,520  | 0,002  | -0,0903 | 0,0937  | -0,2784 |
| <b>GAPDH</b>    | Housekeeping                               | all      | 3-5 d | 15 | 0,696 | 0,110  | -0,426 | 0,589  | 0,022  | -0,0976 | 0,1419  | -0,1202 |

|                 |                                            |           |       |    |       |        |        |        |        |         |         |         |
|-----------------|--------------------------------------------|-----------|-------|----|-------|--------|--------|--------|--------|---------|---------|---------|
| <b>IFITM2</b>   | interferon response and antiviral immunity | all       | 3-5 d | 15 | 0,141 | -0,399 | -0,757 | 0,142  | -0,040 | -0,0955 | 0,0151  | 0,0834  |
| <b>IL10</b>     | Anti-inflammatory                          | all       | 3-5 d | 15 | 0,853 | 0,052  | -0,473 | 0,550  | 0,012  | -0,1222 | 0,1456  | -0,0224 |
| <b>IL1B</b>     | Pro-inflammatory                           | all       | 3-5 d | 15 | 0,018 | -0,601 | -0,851 | -0,128 | -0,105 | -0,1889 | -0,0214 | 0,2713  |
| <b>MARCO</b>    | Phagocytotic activity, scavenger receptor  | all       | 3-5 d | 15 | 0,473 | 0,201  | -0,347 | 0,646  | 0,054  | -0,1036 | 0,2113  | -0,3419 |
| <b>SIGLEC10</b> | Anti-inflammatory                          | all       | 3-5 d | 15 | 0,866 | -0,048 | -0,547 | 0,476  | -0,009 | -0,1207 | 0,1029  | -0,4384 |
| <b>SLC24A4</b>  | cellular calcium ion homeostasis           | all       | 3-5 d | 15 | 0,585 | -0,153 | -0,617 | 0,389  | -0,018 | -0,0898 | 0,0528  | 0,1996  |
| <b>STAT6</b>    | Anti-inflammatory                          | all       | 3-5 d | 15 | 0,560 | -0,164 | -0,624 | 0,380  | -0,027 | -0,1264 | 0,0716  | -0,0369 |
| <b>TGFB1</b>    | Anti-inflammatory, immune modulator        | all       | 3-5 d | 15 | 0,719 | 0,101  | -0,433 | 0,583  | 0,015  | -0,0708 | 0,0998  | -0,2881 |
| <b>TGM2</b>     | Immune modulator                           | all       | 3-5 d | 15 | 0,230 | -0,330 | -0,720 | 0,220  | -0,082 | -0,2236 | 0,0589  | -0,1965 |
| <b>TLR8</b>     | Pro-inflammatory                           | all       | 3-5 d | 15 | 0,976 | -0,008 | -0,518 | 0,506  | -0,001 | -0,0861 | 0,0837  | -0,5450 |
| <b>TNFA</b>     | Pro-inflammatory                           | all       | 3-5 d | 15 | 0,161 | -0,381 | -0,747 | 0,163  | -0,088 | -0,2167 | 0,0401  | -0,1144 |
| <b>TREM1</b>    | Pro-inflammatory                           | all       | 3-5 d | 15 | 0,588 | -0,152 | -0,616 | 0,391  | -0,016 | -0,0774 | 0,0457  | 0,6654  |
| <b>TSPO</b>     | Anti-inflammatory                          | all       | 3-5 d | 15 | 0,575 | -0,157 | -0,620 | 0,386  | -0,021 | -0,0977 | 0,0567  | 0,6140  |
| <b>ACTB</b>     | Housekeeping                               | classical | 3-5 d | 14 | 0,198 | 0,366  | -0,204 | 0,751  | 0,032  | -0,0195 | 0,0843  | -0,0655 |
| <b>ANXA1</b>    | Anti-inflammatory                          | classical | 3-5 d | 15 | 0,891 | 0,039  | -0,483 | 0,540  | 0,013  | -0,1936 | 0,2203  | -0,2951 |
| <b>B2M</b>      | Housekeeping                               | classical | 3-5 d | 14 | 0,392 | 0,248  | -0,325 | 0,688  | 0,021  | -0,0303 | 0,0720  | -0,1504 |
| <b>BDNF</b>     | Neuroplasticity                            | classical | 3-5 d | 15 | 0,874 | 0,045  | -0,478 | 0,545  | 0,008  | -0,0941 | 0,1093  | 0,0338  |
| <b>CCR2</b>     | Monocyte infiltration                      | classical | 3-5 d | 15 | 0,648 | 0,129  | -0,411 | 0,601  | 0,026  | -0,0930 | 0,1445  | 0,2341  |
| <b>CD11B</b>    | Monocyte adhesion and migration            | classical | 3-5 d | 15 | 0,261 | 0,310  | -0,240 | 0,710  | 0,058  | -0,0481 | 0,1632  | 0,1124  |
| <b>CD11C</b>    | Monocyte adhesion                          | classical | 3-5 d | 15 | 0,235 | 0,327  | -0,223 | 0,719  | 0,047  | -0,0347 | 0,1293  | -0,7024 |
| <b>CD169</b>    | Pro-inflammatory                           | classical | 3-5 d | 15 | 0,782 | -0,078 | -0,568 | 0,452  | -0,009 | -0,0780 | 0,0600  | 0,6549  |
| <b>CD31</b>     | Anti-inflammatory                          | classical | 3-5 d | 14 | 0,644 | 0,136  | -0,426 | 0,622  | 0,010  | -0,0368 | 0,0573  | -0,3997 |
| <b>CD32</b>     | Immune modulator                           | classical | 3-5 d | 15 | 0,571 | 0,159  | -0,385 | 0,621  | 0,036  | -0,0971 | 0,1685  | -0,0008 |
| <b>CD33</b>     | Anti-inflammatory                          | classical | 3-5 d | 15 | 0,585 | -0,154 | -0,617 | 0,389  | -0,019 | -0,0907 | 0,0533  | 0,1416  |
| <b>CD36</b>     | Pro-inflammatory                           | classical | 3-5 d | 15 | 0,630 | 0,135  | -0,405 | 0,606  | 0,017  | -0,0587 | 0,0934  | 0,4480  |
| <b>CD38</b>     | Immune modulator                           | classical | 3-5 d | 15 | 0,315 | -0,279 | -0,692 | 0,273  | -0,098 | -0,3004 | 0,1045  | 0,0475  |
| <b>CD40</b>     | Pro-inflammatory                           | classical | 3-5 d | 15 | 0,962 | 0,014  | -0,502 | 0,522  | 0,004  | -0,1550 | 0,1622  | -0,2067 |
| <b>CD64</b>     | Pro-inflammatory                           | classical | 3-5 d | 15 | 0,320 | 0,276  | -0,275 | 0,691  | 0,036  | -0,0392 | 0,1114  | 0,1929  |
| <b>CD86</b>     | Pro-inflammatory                           | classical | 3-5 d | 15 | 0,442 | -0,215 | -0,655 | 0,334  | -0,034 | -0,1281 | 0,0593  | -0,6211 |
| <b>CD91</b>     | Immune modulator                           | classical | 3-5 d | 15 | 0,942 | -0,020 | -0,527 | 0,497  | -0,005 | -0,1565 | 0,1461  | 0,2556  |
| <b>CX3CR1</b>   | Anti-inflammatory                          | classical | 3-5 d | 15 | 0,779 | 0,079  | -0,451 | 0,568  | 0,012  | -0,0808 | 0,1055  | -0,5239 |
| <b>GAPDH</b>    | Housekeeping                               | classical | 3-5 d | 15 | 0,583 | 0,154  | -0,389 | 0,618  | 0,029  | -0,0824 | 0,1405  | 0,0089  |
| <b>IFITM2</b>   | interferon response and antiviral immunity | classical | 3-5 d | 15 | 0,888 | 0,040  | -0,482 | 0,541  | 0,007  | -0,1006 | 0,1149  | -0,0911 |
| <b>IL10</b>     | Anti-inflammatory                          | classical | 3-5 d | 15 | 0,238 | 0,324  | -0,225 | 0,717  | 0,082  | -0,0615 | 0,2261  | -0,2542 |
| <b>IL1B</b>     | Pro-inflammatory                           | classical | 3-5 d | 15 | 0,442 | -0,215 | -0,655 | 0,334  | -0,045 | -0,1659 | 0,0768  | -0,1551 |
| <b>MARCO</b>    | Phagocytotic activity, scavenger receptor  | classical | 3-5 d | 15 | 0,635 | 0,134  | -0,407 | 0,604  | 0,042  | -0,1437 | 0,2270  | -0,2898 |

|                 |                                            |           |       |    |       |        |        |        |        |         |         |         |
|-----------------|--------------------------------------------|-----------|-------|----|-------|--------|--------|--------|--------|---------|---------|---------|
| <b>SIGLEC10</b> | Anti-inflammatory                          | classical | 3-5 d | 15 | 0,681 | 0,116  | -0,422 | 0,593  | 0,025  | -0,1038 | 0,1539  | -0,7057 |
| <b>SLC24A4</b>  | cellular calcium ion homeostasis           | classical | 3-5 d | 15 | 0,382 | -0,244 | -0,672 | 0,307  | -0,034 | -0,1143 | 0,0468  | 0,2595  |
| <b>STAT6</b>    | Anti-inflammatory                          | classical | 3-5 d | 15 | 0,646 | 0,129  | -0,410 | 0,602  | 0,020  | -0,0713 | 0,1110  | -0,3736 |
| <b>TGFB1</b>    | Anti-inflammatory, immune modulator        | classical | 3-5 d | 14 | 0,559 | 0,171  | -0,395 | 0,643  | 0,023  | -0,0595 | 0,1048  | -0,2583 |
| <b>TGM2</b>     | Immune modulator                           | classical | 3-5 d | 15 | 0,884 | 0,041  | -0,481 | 0,542  | 0,010  | -0,1356 | 0,1556  | -0,5025 |
| <b>TLR8</b>     | Pro-inflammatory                           | classical | 3-5 d | 15 | 0,530 | 0,176  | -0,370 | 0,631  | 0,029  | -0,0688 | 0,1273  | -0,2672 |
| <b>TNFA</b>     | Pro-inflammatory                           | classical | 3-5 d | 15 | 0,882 | 0,042  | -0,481 | 0,542  | 0,012  | -0,1662 | 0,1912  | -0,5141 |
| <b>TREM1</b>    | Pro-inflammatory                           | classical | 3-5 d | 15 | 0,410 | -0,230 | -0,664 | 0,320  | -0,023 | -0,0801 | 0,0348  | 0,7049  |
| <b>TSPO</b>     | Anti-inflammatory                          | classical | 3-5 d | 15 | 0,924 | 0,027  | -0,492 | 0,532  | 0,005  | -0,1126 | 0,1232  | 0,3999  |
| <b>ACTB</b>     | Housekeeping                               | intermed  | 3-5 d | 14 | 0,048 | 0,537  | 0,008  | 0,831  | 0,058  | 0,0006  | 0,1152  | 0,3898  |
| <b>ANXA1</b>    | Anti-inflammatory                          | intermed  | 3-5 d | 15 | 0,903 | -0,034 | -0,537 | 0,486  | -0,012 | -0,2140 | 0,1907  | -0,5381 |
| <b>B2M</b>      | Housekeeping                               | intermed  | 3-5 d | 14 | 0,026 | 0,590  | 0,087  | 0,854  | 0,032  | 0,0045  | 0,0592  | 0,1538  |
| <b>BDNF</b>     | Neuroplasticity                            | intermed  | 3-5 d | 15 | 0,485 | 0,196  | -0,352 | 0,643  | 0,022  | -0,0433 | 0,0866  | 0,3605  |
| <b>CCR2</b>     | Monocyte infiltration                      | intermed  | 3-5 d | 15 | 0,225 | 0,333  | -0,216 | 0,722  | 0,092  | -0,0639 | 0,2476  | -0,8390 |
| <b>CD11B</b>    | Monocyte adhesion and migration            | intermed  | 3-5 d | 15 | 0,505 | 0,187  | -0,360 | 0,638  | 0,029  | -0,0626 | 0,1208  | 0,0107  |
| <b>CD11C</b>    | Monocyte adhesion                          | intermed  | 3-5 d | 14 | 0,631 | 0,141  | -0,421 | 0,625  | 0,018  | -0,0611 | 0,0968  | 0,3558  |
| <b>CD169</b>    | Pro-inflammatory                           | intermed  | 3-5 d | 15 | 0,965 | -0,013 | -0,521 | 0,503  | -0,003 | -0,1484 | 0,1423  | 0,2994  |
| <b>CD31</b>     | Anti-inflammatory                          | intermed  | 3-5 d | 14 | 0,998 | 0,001  | -0,530 | 0,531  | 0,000  | -0,0603 | 0,0605  | 0,4527  |
| <b>CD32</b>     | Immune modulator                           | intermed  | 3-5 d | 15 | 0,389 | 0,240  | -0,310 | 0,670  | 0,048  | -0,0678 | 0,1630  | -0,0982 |
| <b>CD33</b>     | Anti-inflammatory                          | intermed  | 3-5 d | 15 | 0,027 | -0,567 | -0,836 | -0,078 | -0,064 | -0,1198 | -0,0083 | 0,6525  |
| <b>CD36</b>     | Pro-inflammatory                           | intermed  | 3-5 d | 15 | 0,982 | -0,006 | -0,517 | 0,508  | -0,001 | -0,0768 | 0,0752  | -0,0797 |
| <b>CD38</b>     | Immune modulator                           | intermed  | 3-5 d | 15 | 0,143 | -0,397 | -0,756 | 0,145  | -0,040 | -0,0947 | 0,0153  | 0,6274  |
| <b>CD40</b>     | Pro-inflammatory                           | intermed  | 3-5 d | 15 | 0,290 | 0,293  | -0,258 | 0,700  | 0,044  | -0,0425 | 0,1313  | 0,0814  |
| <b>CD64</b>     | Pro-inflammatory                           | intermed  | 3-5 d | 15 | 0,485 | 0,196  | -0,352 | 0,643  | 0,036  | -0,0724 | 0,1447  | 0,0845  |
| <b>CD86</b>     | Pro-inflammatory                           | intermed  | 3-5 d | 15 | 0,171 | -0,373 | -0,743 | 0,172  | -0,066 | -0,1653 | 0,0325  | 0,3736  |
| <b>CD91</b>     | Immune modulator                           | intermed  | 3-5 d | 15 | 0,798 | -0,072 | -0,564 | 0,457  | -0,015 | -0,1383 | 0,1084  | 0,4301  |
| <b>CX3CR1</b>   | Anti-inflammatory                          | intermed  | 3-5 d | 15 | 0,745 | 0,092  | -0,441 | 0,577  | 0,020  | -0,1114 | 0,1519  | 0,3460  |
| <b>GAPDH</b>    | Housekeeping                               | intermed  | 3-5 d | 15 | 0,459 | 0,207  | -0,342 | 0,650  | 0,045  | -0,0817 | 0,1707  | -0,1045 |
| <b>IFITM2</b>   | interferon response and antiviral immunity | intermed  | 3-5 d | 15 | 0,639 | -0,132 | -0,604 | 0,408  | -0,020 | -0,1082 | 0,0688  | 0,0617  |
| <b>IL10</b>     | Anti-inflammatory                          | intermed  | 3-5 d | 15 | 0,833 | -0,059 | -0,555 | 0,467  | -0,013 | -0,1394 | 0,1142  | 0,0855  |
| <b>IL1B</b>     | Pro-inflammatory                           | intermed  | 3-5 d | 15 | 0,635 | -0,133 | -0,604 | 0,407  | -0,015 | -0,0811 | 0,0513  | 0,3882  |
| <b>MARCO</b>    | Phagocytotic activity, scavenger receptor  | intermed  | 3-5 d | 15 | 0,142 | 0,397  | -0,144 | 0,756  | 0,113  | -0,0432 | 0,2686  | -0,2625 |
| <b>SIGLEC10</b> | Anti-inflammatory                          | intermed  | 3-5 d | 15 | 0,251 | 0,316  | -0,234 | 0,713  | 0,053  | -0,0419 | 0,1472  | 0,1579  |
| <b>SLC24A4</b>  | cellular calcium ion homeostasis           | intermed  | 3-5 d | 15 | 0,894 | 0,038  | -0,484 | 0,540  | 0,006  | -0,0873 | 0,0991  | 0,3214  |
| <b>STAT6</b>    | Anti-inflammatory                          | intermed  | 3-5 d | 14 | 0,827 | -0,064 | -0,575 | 0,483  | -0,007 | -0,0764 | 0,0622  | 0,3937  |
| <b>TGFB1</b>    | Anti-inflammatory, immune modulator        | intermed  | 3-5 d | 15 | 0,246 | 0,319  | -0,231 | 0,715  | 0,045  | -0,0349 | 0,1244  | -0,0864 |
| <b>TGM2</b>     | Immune modulator                           | intermed  | 3-5 d | 15 | 0,906 | 0,033  | -0,487 | 0,536  | 0,004  | -0,0748 | 0,0836  | 0,5159  |

|                 |                                            |          |       |    |       |        |        |        |        |         |         |         |
|-----------------|--------------------------------------------|----------|-------|----|-------|--------|--------|--------|--------|---------|---------|---------|
| <b>TLR8</b>     | Pro-inflammatory                           | intermed | 3-5 d | 15 | 0,449 | 0,212  | -0,337 | 0,653  | 0,027  | -0,0473 | 0,1009  | -0,1931 |
| <b>TNFA</b>     | Pro-inflammatory                           | intermed | 3-5 d | 15 | 0,276 | 0,301  | -0,250 | 0,705  | 0,056  | -0,0505 | 0,1627  | 0,0837  |
| <b>TREM1</b>    | Pro-inflammatory                           | intermed | 3-5 d | 15 | 0,687 | -0,114 | -0,591 | 0,423  | -0,017 | -0,1076 | 0,0731  | 0,0279  |
| <b>TSPO</b>     | Anti-inflammatory                          | intermed | 3-5 d | 15 | 0,776 | -0,080 | -0,569 | 0,451  | -0,010 | -0,0861 | 0,0657  | 0,5121  |
| <b>ACTB</b>     | Housekeeping                               | nonclass | 3-5 d | 15 | 0,284 | 0,296  | -0,255 | 0,702  | 0,082  | -0,0768 | 0,2413  | 0,0785  |
| <b>ANXA1</b>    | Anti-inflammatory                          | nonclass | 3-5 d | 15 | 0,731 | 0,097  | -0,437 | 0,580  | 0,033  | -0,1697 | 0,2356  | -0,6507 |
| <b>B2M</b>      | Housekeeping                               | nonclass | 3-5 d | 14 | 0,039 | 0,556  | 0,036  | 0,839  | 0,037  | 0,0022  | 0,0712  | 0,2752  |
| <b>BDNF</b>     | Neuroplasticity                            | nonclass | 3-5 d | 15 | 0,806 | 0,069  | -0,459 | 0,562  | 0,013  | -0,1013 | 0,1278  | 0,6672  |
| <b>CCR2</b>     | Monocyte infiltration                      | nonclass | 3-5 d | 15 | 0,400 | 0,234  | -0,316 | 0,667  | 0,062  | -0,0920 | 0,2159  | -0,8020 |
| <b>CD11B</b>    | Monocyte adhesion and migration            | nonclass | 3-5 d | 15 | 0,811 | -0,068 | -0,560 | 0,461  | -0,020 | -0,1940 | 0,1545  | -0,7942 |
| <b>CD11C</b>    | Monocyte adhesion                          | nonclass | 3-5 d | 14 | 0,187 | 0,375  | -0,194 | 0,755  | 0,050  | -0,0280 | 0,1288  | 0,5731  |
| <b>CD169</b>    | Pro-inflammatory                           | nonclass | 3-5 d | 15 | 0,158 | -0,384 | -0,749 | 0,160  | -0,076 | -0,1857 | 0,0336  | -0,5143 |
| <b>CD31</b>     | Anti-inflammatory                          | nonclass | 3-5 d | 14 | 0,142 | 0,413  | -0,150 | 0,774  | 0,043  | -0,0165 | 0,1019  | 0,7445  |
| <b>CD32</b>     | Immune modulator                           | nonclass | 3-5 d | 14 | 0,855 | -0,054 | -0,568 | 0,491  | -0,004 | -0,0486 | 0,0409  | 0,3217  |
| <b>CD33</b>     | Anti-inflammatory                          | nonclass | 3-5 d | 15 | 0,221 | -0,336 | -0,724 | 0,213  | -0,044 | -0,1173 | 0,0298  | 0,3956  |
| <b>CD36</b>     | Pro-inflammatory                           | nonclass | 3-5 d | 15 | 0,631 | -0,135 | -0,606 | 0,405  | -0,027 | -0,1468 | 0,0923  | -0,8914 |
| <b>CD38</b>     | Immune modulator                           | nonclass | 3-5 d | 15 | 0,951 | -0,017 | -0,525 | 0,499  | -0,006 | -0,2049 | 0,1934  | -0,5458 |
| <b>CD40</b>     | Pro-inflammatory                           | nonclass | 3-5 d | 14 | 0,022 | -0,606 | -0,860 | -0,111 | -0,083 | -0,1515 | -0,0144 | 0,6361  |
| <b>CD64</b>     | Pro-inflammatory                           | nonclass | 3-5 d | 14 | 0,327 | -0,283 | -0,707 | 0,291  | -0,033 | -0,1044 | 0,0377  | 0,1526  |
| <b>CD86</b>     | Pro-inflammatory                           | nonclass | 3-5 d | 15 | 0,681 | 0,116  | -0,421 | 0,593  | 0,030  | -0,1257 | 0,1864  | 0,5320  |
| <b>CD91</b>     | Immune modulator                           | nonclass | 3-5 d | 15 | 0,722 | -0,100 | -0,583 | 0,434  | -0,025 | -0,1753 | 0,1248  | 0,3707  |
| <b>CX3CR1</b>   | Anti-inflammatory                          | nonclass | 3-5 d | 15 | 0,703 | 0,107  | -0,428 | 0,587  | 0,025  | -0,1130 | 0,1628  | 0,5433  |
| <b>GAPDH</b>    | Housekeeping                               | nonclass | 3-5 d | 15 | 0,520 | 0,181  | -0,365 | 0,634  | 0,048  | -0,1091 | 0,2055  | -0,0518 |
| <b>IFITM2</b>   | interferon response and antiviral immunity | nonclass | 3-5 d | 14 | 0,166 | -0,392 | -0,764 | 0,175  | -0,044 | -0,1078 | 0,0207  | 0,4508  |
| <b>IL10</b>     | Anti-inflammatory                          | nonclass | 3-5 d | 15 | 0,218 | 0,338  | -0,211 | 0,725  | 0,092  | -0,0614 | 0,2448  | -0,6084 |
| <b>IL1B</b>     | Pro-inflammatory                           | nonclass | 3-5 d | 15 | 0,664 | 0,122  | -0,416 | 0,597  | 0,035  | -0,1343 | 0,2040  | -0,4875 |
| <b>MARCO</b>    | Phagocytotic activity, scavenger receptor  | nonclass | 3-5 d | 15 | 0,336 | 0,267  | -0,284 | 0,685  | 0,083  | -0,0964 | 0,2622  | -0,5427 |
| <b>SIGLEC10</b> | Anti-inflammatory                          | nonclass | 3-5 d | 14 | 0,147 | 0,409  | -0,155 | 0,772  | 0,040  | -0,0163 | 0,0968  | 0,6887  |
| <b>SLC24A4</b>  | cellular calcium ion homeostasis           | nonclass | 3-5 d | 15 | 0,755 | 0,088  | -0,444 | 0,574  | 0,016  | -0,0949 | 0,1277  | -0,0415 |
| <b>STAT6</b>    | Anti-inflammatory                          | nonclass | 3-5 d | 15 | 0,306 | 0,283  | -0,268 | 0,695  | 0,068  | -0,0696 | 0,2051  | 0,2111  |
| <b>TGFB1</b>    | Anti-inflammatory, immune modulator        | nonclass | 3-5 d | 14 | 0,156 | 0,401  | -0,165 | 0,768  | 0,043  | -0,0191 | 0,1060  | 0,1205  |
| <b>TGM2</b>     | Immune modulator                           | nonclass | 3-5 d | 15 | 0,631 | -0,135 | -0,606 | 0,405  | -0,033 | -0,1773 | 0,1115  | -0,1798 |
| <b>TLR8</b>     | Pro-inflammatory                           | nonclass | 3-5 d | 15 | 0,658 | -0,125 | -0,599 | 0,414  | -0,024 | -0,1365 | 0,0892  | 0,0757  |
| <b>TNFA</b>     | Pro-inflammatory                           | nonclass | 3-5 d | 15 | 0,579 | 0,156  | -0,387 | 0,619  | 0,050  | -0,1396 | 0,2393  | 0,0935  |
| <b>TREM1</b>    | Pro-inflammatory                           | nonclass | 3-5 d | 15 | 0,501 | -0,189 | -0,639 | 0,358  | -0,037 | -0,1510 | 0,0777  | -0,4448 |
| <b>TSPO</b>     | Anti-inflammatory                          | nonclass | 3-5 d | 15 | 0,691 | 0,112  | -0,425 | 0,590  | 0,026  | -0,1122 | 0,1641  | -0,1487 |
| <b>ACTB</b>     | Housekeeping                               | all      | 3 mo  | 13 | 0,060 | 0,534  | -0,024 | 0,838  | 0,332  | -0,0168 | 0,6811  | -0,7154 |
| <b>ANXA1</b>    | Anti-inflammatory                          | all      | 3 mo  | 13 | 0,439 | 0,235  | -0,363 | 0,696  | 0,140  | -0,2440 | 0,5246  | -0,1073 |

|                 |                                            |           |      |    |       |        |        |        |        |         |         |         |
|-----------------|--------------------------------------------|-----------|------|----|-------|--------|--------|--------|--------|---------|---------|---------|
| <b>B2M</b>      | Housekeeping                               | all       | 3 mo | 13 | 0,235 | 0,354  | -0,245 | 0,757  | 0,232  | -0,1746 | 0,6387  | -0,6125 |
| <b>BDNF</b>     | Neuroplasticity                            | all       | 3 mo | 13 | 0,942 | 0,023  | -0,535 | 0,567  | 0,015  | -0,4123 | 0,4414  | -0,0506 |
| <b>CCR2</b>     | Monocyte infiltration                      | all       | 3 mo | 13 | 0,002 | 0,777  | 0,396  | 0,930  | 0,360  | 0,1666  | 0,5535  | -0,2267 |
| <b>CD11B</b>    | Monocyte adhesion and migration            | all       | 3 mo | 13 | 0,078 | 0,505  | -0,063 | 0,826  | 0,091  | -0,0122 | 0,1950  | 0,3896  |
| <b>CD11C</b>    | Monocyte adhesion                          | all       | 3 mo | 13 | 0,110 | 0,464  | -0,117 | 0,808  | 0,333  | -0,0890 | 0,7545  | -0,6311 |
| <b>CD169</b>    | Pro-inflammatory                           | all       | 3 mo | 13 | 0,819 | 0,070  | -0,500 | 0,598  | 0,026  | -0,2180 | 0,2699  | 0,4384  |
| <b>CD31</b>     | Anti-inflammatory                          | all       | 3 mo | 13 | 0,333 | 0,292  | -0,309 | 0,726  | 0,185  | -0,2177 | 0,5885  | -0,5643 |
| <b>CD32</b>     | Immune modulator                           | all       | 3 mo | 13 | 0,252 | 0,343  | -0,257 | 0,752  | 0,224  | -0,1833 | 0,6311  | -0,3326 |
| <b>CD33</b>     | Anti-inflammatory                          | all       | 3 mo | 13 | 0,753 | -0,097 | -0,615 | 0,480  | -0,059 | -0,4587 | 0,3413  | 0,4248  |
| <b>CD36</b>     | Pro-inflammatory                           | all       | 3 mo | 13 | 0,360 | 0,277  | -0,323 | 0,718  | 0,115  | -0,1502 | 0,3806  | 0,3548  |
| <b>CD38</b>     | Immune modulator                           | all       | 3 mo | 13 | 0,083 | -0,499 | -0,823 | 0,072  | -0,143 | -0,3074 | 0,0220  | 0,4821  |
| <b>CD40</b>     | Pro-inflammatory                           | all       | 3 mo | 13 | 0,483 | 0,214  | -0,382 | 0,684  | 0,180  | -0,3649 | 0,7242  | -0,3159 |
| <b>CD64</b>     | Pro-inflammatory                           | all       | 3 mo | 13 | 0,072 | 0,515  | -0,051 | 0,830  | 0,285  | -0,0302 | 0,6008  | -0,1821 |
| <b>CD86</b>     | Pro-inflammatory                           | all       | 3 mo | 13 | 0,704 | 0,117  | -0,464 | 0,627  | 0,065  | -0,3004 | 0,4296  | -0,3194 |
| <b>CD91</b>     | Immune modulator                           | all       | 3 mo | 13 | 0,137 | -0,436 | -0,796 | 0,152  | -0,218 | -0,5180 | 0,0810  | 0,6274  |
| <b>CX3CR1</b>   | Anti-inflammatory                          | all       | 3 mo | 13 | 0,075 | 0,510  | -0,056 | 0,828  | 0,410  | -0,0484 | 0,8683  | -0,7995 |
| <b>GAPDH</b>    | Housekeeping                               | all       | 3 mo | 13 | 0,352 | 0,281  | -0,319 | 0,721  | 0,137  | -0,1733 | 0,4479  | -0,6001 |
| <b>IFITM2</b>   | interferon response and antiviral immunity | all       | 3 mo | 13 | 0,697 | 0,120  | -0,462 | 0,629  | 0,078  | -0,3500 | 0,5053  | -0,2498 |
| <b>IL10</b>     | Anti-inflammatory                          | all       | 3 mo | 13 | 0,630 | -0,148 | -0,646 | 0,439  | -0,090 | -0,4871 | 0,3079  | 0,1985  |
| <b>IL1B</b>     | Pro-inflammatory                           | all       | 3 mo | 13 | 0,731 | 0,106  | -0,473 | 0,620  | 0,052  | -0,2726 | 0,3763  | -0,0552 |
| <b>MARCO</b>    | Phagocytotic activity, scavenger receptor  | all       | 3 mo | 13 | 0,366 | 0,274  | -0,327 | 0,717  | 0,189  | -0,2521 | 0,6304  | -0,3418 |
| <b>SIGLEC10</b> | Anti-inflammatory                          | all       | 3 mo | 13 | 0,556 | 0,180  | -0,412 | 0,665  | 0,125  | -0,3290 | 0,5796  | -0,6603 |
| <b>SLC24A4</b>  | cellular calcium ion homeostasis           | all       | 3 mo | 13 | 0,049 | -0,554 | -0,847 | -0,005 | -0,255 | -0,5082 | -0,0009 | 0,4459  |
| <b>STAT6</b>    | Anti-inflammatory                          | all       | 3 mo | 13 | 0,021 | 0,629  | 0,119  | 0,876  | 0,306  | 0,0548  | 0,5564  | -0,7837 |
| <b>TGFB1</b>    | Anti-inflammatory, immune modulator        | all       | 3 mo | 13 | 0,534 | 0,190  | -0,403 | 0,671  | 0,142  | -0,3442 | 0,6276  | -0,3006 |
| <b>TGM2</b>     | Immune modulator                           | all       | 3 mo | 13 | 0,106 | -0,469 | -0,811 | 0,110  | -0,302 | -0,6785 | 0,0750  | 0,5227  |
| <b>TLR8</b>     | Pro-inflammatory                           | all       | 3 mo | 13 | 0,594 | 0,163  | -0,426 | 0,655  | 0,114  | -0,3443 | 0,5727  | -0,3303 |
| <b>TNFA</b>     | Pro-inflammatory                           | all       | 3 mo | 13 | 0,292 | -0,316 | -0,739 | 0,284  | -0,229 | -0,6858 | 0,2270  | -0,0308 |
| <b>TREM1</b>    | Pro-inflammatory                           | all       | 3 mo | 13 | 0,469 | -0,221 | -0,688 | 0,376  | -0,070 | -0,2750 | 0,1352  | 0,6632  |
| <b>TSPO</b>     | Anti-inflammatory                          | all       | 3 mo | 13 | 0,588 | 0,166  | -0,424 | 0,657  | 0,106  | -0,3126 | 0,5246  | -0,0008 |
| <b>ACTB</b>     | Housekeeping                               | classical | 3 mo | 13 | 0,077 | 0,508  | -0,060 | 0,827  | 0,357  | -0,0452 | 0,7591  | -0,8288 |
| <b>ANXA1</b>    | Anti-inflammatory                          | classical | 3 mo | 13 | 0,390 | 0,261  | -0,339 | 0,710  | 0,174  | -0,2534 | 0,6013  | -0,1583 |
| <b>B2M</b>      | Housekeeping                               | classical | 3 mo | 13 | 0,121 | 0,452  | -0,132 | 0,803  | 0,348  | -0,1080 | 0,8033  | -0,7858 |
| <b>BDNF</b>     | Neuroplasticity                            | classical | 3 mo | 13 | 0,661 | -0,135 | -0,638 | 0,450  | -0,090 | -0,5305 | 0,3503  | 0,2319  |
| <b>CCR2</b>     | Monocyte infiltration                      | classical | 3 mo | 13 | 0,010 | 0,686  | 0,217  | 0,898  | 0,334  | 0,0987  | 0,5688  | 0,0819  |
| <b>CD11B</b>    | Monocyte adhesion and migration            | classical | 3 mo | 13 | 0,193 | 0,386  | -0,210 | 0,773  | 0,124  | -0,0725 | 0,3197  | 0,1772  |
| <b>CD11C</b>    | Monocyte adhesion                          | classical | 3 mo | 13 | 0,166 | 0,409  | -0,184 | 0,783  | 0,228  | -0,1101 | 0,5665  | -0,6937 |

|                 |                                            |              |      |    |       |        |        |        |        |         |         |         |
|-----------------|--------------------------------------------|--------------|------|----|-------|--------|--------|--------|--------|---------|---------|---------|
| <b>CD169</b>    | Pro-inflammatory                           | classical    | 3 mo | 12 | 0,670 | 0,138  | -0,474 | 0,659  | 0,021  | -0,0859 | 0,1280  | 0,7115  |
| <b>CD31</b>     | Anti-inflammatory                          | classical    | 3 mo | 13 | 0,270 | 0,331  | -0,269 | 0,746  | 0,240  | -0,2144 | 0,6938  | -0,7679 |
| <b>CD32</b>     | Immune modulator                           | classical    | 3 mo | 13 | 0,517 | 0,198  | -0,396 | 0,675  | 0,144  | -0,3285 | 0,6156  | -0,2463 |
| <b>CD33</b>     | Anti-inflammatory                          | classical    | 3 mo | 13 | 0,931 | -0,027 | -0,569 | 0,532  | -0,011 | -0,2730 | 0,2519  | 0,2455  |
| <b>CD36</b>     | Pro-inflammatory                           | classical    | 3 mo | 13 | 0,968 | 0,012  | -0,542 | 0,559  | 0,005  | -0,2680 | 0,2781  | 0,4571  |
| <b>CD38</b>     | Immune modulator                           | classical    | 3 mo | 13 | 0,321 | -0,299 | -0,730 | 0,302  | -0,088 | -0,2749 | 0,0986  | 0,4412  |
| <b>CD40</b>     | Pro-inflammatory                           | classical    | 3 mo | 13 | 0,604 | 0,159  | -0,430 | 0,653  | 0,140  | -0,4382 | 0,7185  | -0,4369 |
| <b>CD64</b>     | Pro-inflammatory                           | classical    | 3 mo | 13 | 0,252 | 0,342  | -0,257 | 0,752  | 0,187  | -0,1538 | 0,5282  | -0,0421 |
| <b>CD86</b>     | Pro-inflammatory                           | classical    | 3 mo | 13 | 0,678 | 0,128  | -0,455 | 0,634  | 0,062  | -0,2577 | 0,3818  | -0,4971 |
| <b>CD91</b>     | Immune modulator                           | classical    | 3 mo | 13 | 0,049 | -0,555 | -0,847 | -0,006 | -0,372 | -0,7429 | -0,0018 | 0,7167  |
| <b>CX3CR1</b>   | Anti-inflammatory                          | classical    | 3 mo | 13 | 0,068 | 0,521  | -0,042 | 0,833  | 0,376  | -0,0331 | 0,7850  | -0,8624 |
| <b>GAPDH</b>    | Housekeeping                               | classical    | 3 mo | 13 | 0,257 | 0,339  | -0,261 | 0,750  | 0,177  | -0,1493 | 0,5043  | -0,5675 |
| <b>IFITM2</b>   | interferon response and antiviral immunity | classical    | 3 mo | 13 | 0,920 | 0,031  | -0,529 | 0,572  | 0,018  | -0,3593 | 0,3944  | -0,2878 |
| <b>IL10</b>     | Anti-inflammatory                          | classical    | 3 mo | 13 | 0,687 | -0,124 | -0,632 | 0,459  | -0,083 | -0,5248 | 0,3588  | 0,4840  |
| <b>IL1B</b>     | Pro-inflammatory                           | classical    | 3 mo | 13 | 0,823 | -0,069 | -0,597 | 0,501  | -0,034 | -0,3599 | 0,2921  | 0,1833  |
| <b>MARCO</b>    | Phagocytotic activity, scavenger receptor  | classical    | 3 mo | 13 | 0,677 | -0,128 | -0,634 | 0,455  | -0,102 | -0,6234 | 0,4203  | -0,0209 |
| <b>SIGLEC10</b> | Anti-inflammatory                          | classical    | 3 mo | 13 | 0,925 | -0,029 | -0,571 | 0,530  | -0,025 | -0,5953 | 0,5452  | -0,7169 |
| <b>SLC24A4</b>  | cellular calcium ion homeostasis           | classical    | 3 mo | 13 | 0,044 | -0,566 | -0,852 | -0,022 | -0,199 | -0,3913 | -0,0068 | 0,3812  |
| <b>STAT6</b>    | Anti-inflammatory                          | classical    | 3 mo | 13 | 0,123 | 0,450  | -0,135 | 0,802  | 0,239  | -0,0760 | 0,5531  | -0,6069 |
| <b>TGFB1</b>    | Anti-inflammatory, immune modulator        | classical    | 3 mo | 13 | 0,576 | 0,171  | -0,419 | 0,660  | 0,152  | -0,4287 | 0,7326  | -0,3126 |
| <b>TGM2</b>     | Immune modulator                           | classical    | 3 mo | 13 | 0,105 | -0,470 | -0,811 | 0,109  | -0,333 | -0,7480 | 0,0817  | 0,3601  |
| <b>TLR8</b>     | Pro-inflammatory                           | classical    | 3 mo | 13 | 0,781 | -0,086 | -0,608 | 0,488  | -0,077 | -0,6699 | 0,5162  | -0,2957 |
| <b>TNFA</b>     | Pro-inflammatory                           | classical    | 3 mo | 13 | 0,102 | -0,474 | -0,813 | 0,104  | -0,292 | -0,6509 | 0,0677  | -0,1361 |
| <b>TREM1</b>    | Pro-inflammatory                           | classical    | 3 mo | 13 | 0,966 | -0,013 | -0,560 | 0,542  | -0,004 | -0,1798 | 0,1728  | 0,6214  |
| <b>TSPO</b>     | Anti-inflammatory                          | classical    | 3 mo | 13 | 0,722 | 0,110  | -0,470 | 0,623  | 0,105  | -0,5264 | 0,7363  | 0,1130  |
| <b>ACTB</b>     | Housekeeping                               | intermediate | 3 mo | 13 | 0,047 | 0,559  | 0,011  | 0,848  | 0,474  | 0,0070  | 0,9416  | -0,4846 |
| <b>ANXA1</b>    | Anti-inflammatory                          | intermediate | 3 mo | 13 | 0,666 | 0,133  | -0,451 | 0,637  | 0,080  | -0,3160 | 0,4756  | -0,2666 |
| <b>B2M</b>      | Housekeeping                               | intermediate | 3 mo | 13 | 0,087 | 0,493  | -0,079 | 0,821  | 0,384  | -0,0652 | 0,8338  | -0,5212 |
| <b>BDNF</b>     | Neuroplasticity                            | intermediate | 3 mo | 13 | 0,417 | 0,247  | -0,352 | 0,702  | 0,136  | -0,2185 | 0,4904  | 0,1971  |
| <b>CCR2</b>     | Monocyte infiltration                      | intermediate | 3 mo | 13 | 0,049 | 0,556  | 0,007  | 0,847  | 0,362  | 0,0025  | 0,7217  | -0,8952 |
| <b>CD11B</b>    | Monocyte adhesion and migration            | intermediate | 3 mo | 13 | 0,022 | 0,627  | 0,117  | 0,876  | 0,266  | 0,0469  | 0,4849  | -0,2236 |
| <b>CD11C</b>    | Monocyte adhesion                          | intermediate | 3 mo | 13 | 0,057 | 0,539  | -0,017 | 0,840  | 0,462  | -0,0171 | 0,9418  | -0,3882 |
| <b>CD169</b>    | Pro-inflammatory                           | intermediate | 3 mo | 13 | 0,430 | -0,240 | -0,698 | 0,359  | -0,169 | -0,6234 | 0,2854  | 0,1731  |
| <b>CD31</b>     | Anti-inflammatory                          | intermediate | 3 mo | 13 | 0,106 | 0,469  | -0,111 | 0,810  | 0,379  | -0,0951 | 0,8526  | -0,2423 |
| <b>CD32</b>     | Immune modulator                           | intermediate | 3 mo | 13 | 0,312 | 0,305  | -0,296 | 0,733  | 0,179  | -0,1929 | 0,5514  | -0,1914 |
| <b>CD33</b>     | Anti-inflammatory                          | intermediate | 3 mo | 13 | 0,997 | 0,001  | -0,550 | 0,552  | 0,000  | -0,2417 | 0,2424  | 0,3615  |
| <b>CD36</b>     | Pro-inflammatory                           | intermediate | 3 mo | 13 | 0,790 | -0,082 | -0,606 | 0,491  | -0,039 | -0,3501 | 0,2727  | 0,1292  |

|                 |                                            |          |      |    |       |        |        |        |        |         |         |         |
|-----------------|--------------------------------------------|----------|------|----|-------|--------|--------|--------|--------|---------|---------|---------|
| <b>CD38</b>     | Immune modulator                           | intermed | 3 mo | 13 | 0,070 | -0,518 | -0,832 | 0,046  | -0,160 | -0,3351 | 0,0154  | 0,7352  |
| <b>CD40</b>     | Pro-inflammatory                           | intermed | 3 mo | 13 | 0,292 | 0,317  | -0,284 | 0,739  | 0,139  | -0,1372 | 0,4152  | 0,1501  |
| <b>CD64</b>     | Pro-inflammatory                           | intermed | 3 mo | 13 | 0,065 | 0,526  | -0,036 | 0,835  | 0,242  | -0,0180 | 0,5018  | -0,1189 |
| <b>CD86</b>     | Pro-inflammatory                           | intermed | 3 mo | 13 | 0,551 | 0,182  | -0,410 | 0,666  | 0,104  | -0,2671 | 0,4743  | 0,2485  |
| <b>CD91</b>     | Immune modulator                           | intermed | 3 mo | 13 | 0,076 | -0,508 | -0,827 | 0,060  | -0,334 | -0,7108 | 0,0419  | 0,6098  |
| <b>CX3CR1</b>   | Anti-inflammatory                          | intermed | 3 mo | 13 | 0,060 | 0,534  | -0,023 | 0,839  | 0,415  | -0,0205 | 0,8514  | -0,0417 |
| <b>GAPDH</b>    | Housekeeping                               | intermed | 3 mo | 13 | 0,189 | 0,389  | -0,206 | 0,774  | 0,210  | -0,1196 | 0,5392  | -0,5001 |
| <b>IFITM2</b>   | interferon response and antiviral immunity | intermed | 3 mo | 13 | 0,184 | 0,393  | -0,202 | 0,776  | 0,185  | -0,1021 | 0,4712  | -0,2070 |
| <b>IL10</b>     | Anti-inflammatory                          | intermed | 3 mo | 13 | 0,591 | -0,165 | -0,656 | 0,425  | -0,092 | -0,4563 | 0,2727  | 0,4474  |
| <b>IL1B</b>     | Pro-inflammatory                           | intermed | 3 mo | 13 | 0,598 | -0,162 | -0,654 | 0,427  | -0,041 | -0,2057 | 0,1242  | 0,3515  |
| <b>MARCO</b>    | Phagocytotic activity, scavenger receptor  | intermed | 3 mo | 13 | 0,132 | 0,441  | -0,146 | 0,798  | 0,301  | -0,1060 | 0,7082  | -0,2420 |
| <b>SIGLEC10</b> | Anti-inflammatory                          | intermed | 3 mo | 13 | 0,261 | 0,337  | -0,263 | 0,749  | 0,234  | -0,1998 | 0,6668  | -0,1230 |
| <b>SLC24A4</b>  | cellular calcium ion homeostasis           | intermed | 3 mo | 13 | 0,289 | -0,319 | -0,740 | 0,282  | -0,151 | -0,4499 | 0,1474  | 0,5140  |
| <b>STAT6</b>    | Anti-inflammatory                          | intermed | 3 mo | 13 | 0,086 | 0,494  | -0,079 | 0,821  | 0,329  | -0,0556 | 0,7133  | -0,3438 |
| <b>TGFB1</b>    | Anti-inflammatory, immune modulator        | intermed | 3 mo | 13 | 0,128 | 0,445  | -0,141 | 0,800  | 0,283  | -0,0949 | 0,6601  | -0,2985 |
| <b>TGM2</b>     | Immune modulator                           | intermed | 3 mo | 13 | 0,343 | -0,286 | -0,723 | 0,314  | -0,056 | -0,1807 | 0,0685  | 0,9208  |
| <b>TLR8</b>     | Pro-inflammatory                           | intermed | 3 mo | 13 | 0,668 | 0,132  | -0,452 | 0,636  | 0,061  | -0,2462 | 0,3692  | -0,2070 |
| <b>TNFA</b>     | Pro-inflammatory                           | intermed | 3 mo | 13 | 0,636 | -0,145 | -0,645 | 0,441  | -0,057 | -0,3139 | 0,2002  | 0,1620  |
| <b>TREM1</b>    | Pro-inflammatory                           | intermed | 3 mo | 13 | 0,608 | -0,157 | -0,652 | 0,431  | -0,087 | -0,4478 | 0,2746  | -0,0156 |
| <b>TSPO</b>     | Anti-inflammatory                          | intermed | 3 mo | 13 | 0,275 | 0,327  | -0,273 | 0,744  | 0,197  | -0,1811 | 0,5761  | 0,1769  |
| <b>ACTB</b>     | Housekeeping                               | nonclass | 3 mo | 13 | 0,140 | 0,432  | -0,156 | 0,794  | 0,364  | -0,1403 | 0,8691  | -0,1992 |
| <b>ANXA1</b>    | Anti-inflammatory                          | nonclass | 3 mo | 13 | 0,782 | 0,085  | -0,489 | 0,608  | 0,059  | -0,3980 | 0,5156  | -0,1400 |
| <b>B2M</b>      | Housekeeping                               | nonclass | 3 mo | 13 | 0,178 | 0,398  | -0,196 | 0,778  | 0,386  | -0,2054 | 0,9783  | -0,3776 |
| <b>BDNF</b>     | Neuroplasticity                            | nonclass | 3 mo | 13 | 0,858 | 0,055  | -0,511 | 0,588  | 0,053  | -0,5781 | 0,6834  | 0,5744  |
| <b>CCR2</b>     | Monocyte infiltration                      | nonclass | 3 mo | 13 | 0,132 | 0,441  | -0,145 | 0,798  | 0,289  | -0,1014 | 0,6795  | -1,0393 |
| <b>CD11B</b>    | Monocyte adhesion and migration            | nonclass | 3 mo | 13 | 0,478 | -0,216 | -0,686 | 0,380  | -0,112 | -0,4489 | 0,2243  | -0,6229 |
| <b>CD11C</b>    | Monocyte adhesion                          | nonclass | 3 mo | 13 | 0,143 | 0,429  | -0,160 | 0,793  | 0,375  | -0,1486 | 0,8977  | 0,2570  |
| <b>CD169</b>    | Pro-inflammatory                           | nonclass | 3 mo | 13 | 0,176 | -0,399 | -0,779 | 0,194  | -0,265 | -0,6698 | 0,1390  | -0,5289 |
| <b>CD31</b>     | Anti-inflammatory                          | nonclass | 3 mo | 13 | 0,204 | 0,377  | -0,220 | 0,768  | 0,389  | -0,2450 | 1,0224  | 0,2375  |
| <b>CD32</b>     | Immune modulator                           | nonclass | 3 mo | 13 | 0,688 | 0,123  | -0,459 | 0,631  | 0,104  | -0,4496 | 0,6566  | -0,0789 |
| <b>CD33</b>     | Anti-inflammatory                          | nonclass | 3 mo | 13 | 0,612 | -0,156 | -0,651 | 0,432  | -0,083 | -0,4315 | 0,2659  | 0,4603  |
| <b>CD36</b>     | Pro-inflammatory                           | nonclass | 3 mo | 13 | 0,323 | -0,298 | -0,729 | 0,303  | -0,228 | -0,7130 | 0,2568  | -0,5900 |
| <b>CD38</b>     | Immune modulator                           | nonclass | 3 mo | 13 | 0,448 | -0,231 | -0,694 | 0,367  | -0,159 | -0,6048 | 0,2863  | -0,0077 |
| <b>CD40</b>     | Pro-inflammatory                           | nonclass | 3 mo | 13 | 0,473 | 0,219  | -0,378 | 0,687  | 0,132  | -0,2595 | 0,5239  | 0,1817  |
| <b>CD64</b>     | Pro-inflammatory                           | nonclass | 3 mo | 13 | 0,563 | 0,177  | -0,415 | 0,663  | 0,132  | -0,3554 | 0,6192  | -0,3387 |
| <b>CD86</b>     | Pro-inflammatory                           | nonclass | 3 mo | 13 | 0,739 | 0,102  | -0,475 | 0,619  | 0,094  | -0,5111 | 0,6990  | 0,7690  |
| <b>CD91</b>     | Immune modulator                           | nonclass | 3 mo | 13 | 0,031 | -0,599 | -0,865 | -0,072 | -0,478 | -0,9029 | -0,0541 | 0,9560  |
| <b>CX3CR1</b>   | Anti-inflammatory                          | nonclass | 3 mo | 13 | 0,076 | 0,508  | -0,060 | 0,827  | 0,443  | -0,0553 | 0,9409  | 0,1520  |

|                 |                                            |          |      |    |       |        |        |        |        |         |         |         |
|-----------------|--------------------------------------------|----------|------|----|-------|--------|--------|--------|--------|---------|---------|---------|
| <b>GAPDH</b>    | Housekeeping                               | nonclass | 3 mo | 13 | 0,235 | 0,354  | -0,244 | 0,757  | 0,244  | -0,1833 | 0,6707  | -0,4744 |
| <b>IFITM2</b>   | interferon response and antiviral immunity | nonclass | 3 mo | 13 | 0,686 | 0,124  | -0,458 | 0,632  | 0,058  | -0,2486 | 0,3642  | 0,0580  |
| <b>IL10</b>     | Anti-inflammatory                          | nonclass | 3 mo | 13 | 0,035 | -0,587 | -0,860 | -0,053 | -0,376 | -0,7203 | -0,0318 | 0,3811  |
| <b>IL1B</b>     | Pro-inflammatory                           | nonclass | 3 mo | 13 | 0,144 | -0,429 | -0,793 | 0,160  | -0,241 | -0,5788 | 0,0960  | 0,0985  |
| <b>MARCO</b>    | Phagocytotic activity, scavenger receptor  | nonclass | 3 mo | 13 | 0,931 | -0,027 | -0,569 | 0,532  | -0,021 | -0,5391 | 0,4974  | -0,0284 |
| <b>SIGLEC10</b> | Anti-inflammatory                          | nonclass | 3 mo | 13 | 0,160 | 0,414  | -0,178 | 0,786  | 0,346  | -0,1594 | 0,8518  | 0,0337  |
| <b>SLC24A4</b>  | cellular calcium ion homeostasis           | nonclass | 3 mo | 13 | 0,006 | -0,714 | -0,908 | -0,269 | -0,509 | -0,8400 | -0,1779 | 0,5671  |
| <b>STAT6</b>    | Anti-inflammatory                          | nonclass | 3 mo | 13 | 0,178 | 0,398  | -0,196 | 0,778  | 0,367  | -0,1949 | 0,9282  | -0,2559 |
| <b>TGFB1</b>    | Anti-inflammatory, immune modulator        | nonclass | 3 mo | 13 | 0,576 | 0,171  | -0,419 | 0,660  | 0,163  | -0,4594 | 0,7855  | 0,1576  |
| <b>TGM2</b>     | Immune modulator                           | nonclass | 3 mo | 13 | 0,115 | -0,459 | -0,806 | 0,123  | -0,342 | -0,7802 | 0,0971  | 0,3411  |
| <b>TLR8</b>     | Pro-inflammatory                           | nonclass | 3 mo | 13 | 0,611 | 0,156  | -0,432 | 0,651  | 0,120  | -0,3846 | 0,6250  | -0,1310 |
| <b>TNFA</b>     | Pro-inflammatory                           | nonclass | 3 mo | 13 | 0,150 | -0,423 | -0,790 | 0,167  | -0,215 | -0,5212 | 0,0908  | 0,6486  |
| <b>TREM1</b>    | Pro-inflammatory                           | nonclass | 3 mo | 13 | 0,314 | -0,303 | -0,732 | 0,297  | -0,200 | -0,6186 | 0,2176  | -0,3342 |
| <b>TSPO</b>     | Anti-inflammatory                          | nonclass | 3 mo | 13 | 0,866 | -0,052 | -0,586 | 0,514  | -0,049 | -0,6677 | 0,5704  | 0,1302  |
