# Supplementary material for: Time-dependent changes in monocyte subsets and gene expression patterns are associated with long-term recovery in patients with ischemic stroke
Source: Research Square preprint supplement (doi:10.21203/rs.3.rs-8980124/v1), 2026-03-16
Supplement: Supplementary file 7 [file 9b0650bf550be2a695f605e6.pdf]

## List of FACS antibodies used in this study

| Fluorochrome  | Ratio | Cat. No. | Link                                                                                                                                                                                                                                                                                                                                                                                                                | Company       |
|---------------|-------|----------|---------------------------------------------------------------------------------------------------------------------------------------------------------------------------------------------------------------------------------------------------------------------------------------------------------------------------------------------------------------------------------------------------------------------|---------------|
| PE            | 4     | 550497   | <a href="https://wwwbdbiosciences.com/us/reagents/research/antibodies-buffers/immunology-reagents/anti-human-antibodies/cell-surface-antigens/pe-mouse-anti-human-cd91-a2mr-2/p/550497">https://wwwbdbiosciences.com/us/reagents/research/antibodies-buffers/immunology-reagents/anti-human-antibodies/cell-surface-antigens/pe-mouse-anti-human-cd91-a2mr-2/p/550497</a>                                           | BD Bioscience |
| APC           | 4     | 562335   | <a href="https://wwwbdbiosciences.com/us/applications/research/stem-cell-research/hematopoietic-stem-cell-markers/human/negative-markers/pe-cf594-mouse-anti-human-cd14-mp9-also-known-as-mp-9/p/562335">https://wwwbdbiosciences.com/us/applications/research/stem-cell-research/hematopoietic-stem-cell-markers/human/negative-markers/pe-cf594-mouse-anti-human-cd14-mp9-also-known-as-mp-9/p/562335</a>         | BD Bioscience |
| BV421         | 2     | 562878   | <a href="https://wwwbdbiosciences.com/us/applications/research/stem-cell-research/cancer-research/human/bv421-mouse-anti-human-cd16-3g8/p/562878">https://wwwbdbiosciences.com/us/applications/research/stem-cell-research/cancer-research/human/bv421-mouse-anti-human-cd16-3g8/p/562878</a>                                                                                                                       | BD Bioscience |
| PE-Cy7        | 2     | 557851   | <a href="http://wwwbdbiosciences.com/us/applications/research/t-cell-immunology/th-1-cells/surface-markers/human/pe-cy7-mouse-anti-human-cd3-sk7-also-known-as-leu-4/p/557851">http://wwwbdbiosciences.com/us/applications/research/t-cell-immunology/th-1-cells/surface-markers/human/pe-cy7-mouse-anti-human-cd3-sk7-also-known-as-leu-4/p/557851</a>                                                             | BD Bioscience |
| BB515         | 4     | 564456   | <a href="http://wwwbdbiosciences.com/us/applications/research/stem-cell-research/hematopoietic-stem-cell-markers/human/negative-markers/bb515-mouse-anti-human-cd19-hib19/p/564456">http://wwwbdbiosciences.com/us/applications/research/stem-cell-research/hematopoietic-stem-cell-markers/human/negative-markers/bb515-mouse-anti-human-cd19-hib19/p/564456</a>                                                   | BD Bioscience |
| BV605         | 10    | 562779   | <a href="https://wwwbdbiosciences.com/us/applications/research/stem-cell-research/hematopoietic-stem-cell-markers/human/negative-markers/bv605-mouse-anti-human-cd56-ncam162-also-known-as-ncam-16/p/562779">https://wwwbdbiosciences.com/us/applications/research/stem-cell-research/hematopoietic-stem-cell-markers/human/negative-markers/bv605-mouse-anti-human-cd56-ncam162-also-known-as-ncam-16/p/562779</a> | BD Bioscience |
| Darq7         | 1     | 564904   | <a href="https://wwwbdbiosciences.com/us/applications/research/intracellular-flow/intracellular-buffers-and-ancillary-reagents/draq7/p/564904">https://wwwbdbiosciences.com/us/applications/research/intracellular-flow/intracellular-buffers-and-ancillary-reagents/draq7/p/564904</a>                                                                                                                             | BD Bioscience |
| AlexaFlour700 | 2     | 561603   | <a href="https://wwwbdbiosciences.com/en-se/products/reagents/flow-cytometry-reagents/research-reagents/single-color-antibodies-ruo/alexa-fluor-700-mouse-anti-human-cd7.561603">https://wwwbdbiosciences.com/en-se/products/reagents/flow-cytometry-reagents/research-reagents/single-color-antibodies-ruo/alexa-fluor-700-mouse-anti-human-cd7.561603</a>                                                         | BD Bioscience |
