# Supplementary material for: Time-dependent changes in monocyte subsets and gene expression patterns are associated with long-term recovery in patients with ischemic stroke
Source: Research Square preprint supplement (doi:10.21203/rs.3.rs-8980124/v1), 2026-03-16
Supplement: Supplementary file 8 [file a51fc41fa07c43856bf85bdf.pdf]

## List of primers used in the study

| Gene            | GeneID | Function                                        | ThermoFischer #  | Amplicon length           |
|-----------------|--------|-------------------------------------------------|------------------|---------------------------|
| <b>CD36</b>     | 01     | Pro-inflammatory                                | Hs01060665_g1    | 63                        |
| <b>CD169</b>    | 02     | Pro-inflammatory                                | Hs00167549_m1    | 66                        |
| <b>CD86</b>     | 03     | Pro-inflammatory                                | Hs00968979_m1    | 78                        |
| <b>CD64</b>     | 04     | Pro-inflammatory                                | Hs02718934_s1    | 71                        |
| <b>CD40</b>     | 05     | Pro-inflammatory                                | Hs01128674_g1    | 112                       |
| <b>CD62</b>     | 06     | Pro-inflammatory                                | Hs00922012_g1    | 75                        |
| <b>S100A9</b>   | 07     | Pro-inflammatory                                | Hs00704702_s1    | 61                        |
| <b>S100A8</b>   | 08     | Pro-inflammatory                                | Hs00167304_m1    | 77                        |
| <b>TREM1</b>    | 09     | Pro-inflammatory                                | Hs01015064_m1    | 89                        |
| <b>TNFA</b>     | 10     | Pro-inflammatory                                | Hs00988069_m1    | 62                        |
| <b>IL1B</b>     | 11     | Pro-inflammatory                                | Hs99999192_m1    | 81                        |
| <b>TLR8</b>     | 12     | Pro-inflammatory                                | Hs00267207_m1    | 69                        |
| <b>CLEC7A</b>   | 13     | Pro-inflammatory                                | Hs00609515_m1    | 99                        |
| <b>ANXA1</b>    | 14     | Anti-inflammatory                               | Hs01065279_m1    | 78                        |
| <b>TSPO</b>     | 15     | Anti-inflammatory                               | Hs01634996_s1    | 90                        |
| <b>CX3CR1</b>   | 16     | Anti-inflammatory                               | Hs01076282_g1    | 64                        |
| <b>TGFB1</b>    | 17     | Anti-inflammatory,<br>immune modulator          | Hs00354519_m1    | 83                        |
| <b>CD31</b>     | 18     | Anti-inflammatory                               | Hs01120071_m1    | 67                        |
| <b>STAT6</b>    | 19     | Anti-inflammatory                               | Hs00374176_m1    | 101                       |
| <b>CD33</b>     | 20     | Anti-inflammatory                               | Hs00941829_m1    | 83                        |
| <b>SIGLEC10</b> | 21     | Anti-inflammatory                               | Hs00927900_m1    | 65                        |
| <b>IL10</b>     | 22     | Anti-inflammatory                               | Hs00417598_m1    | 70                        |
| <b>CD91</b>     | 23     | Immune modulator                                | Hs00196191_m1    | 107                       |
| <b>TGM2</b>     | 24     | Immune modulator                                | Hs01567022_m1    | 80                        |
| <b>CD38</b>     | 25     | Immune modulator                                | Hs00233856_m1    | 64                        |
| <b>CD32</b>     | 26     | Immune modulator                                | Hs01902549_s1    | 89                        |
| <b>MARCO</b>    | 27     | Phagocytotic<br>activity, scavenger<br>receptor | Hs00365842_m1    | 72                        |
| <b>CCR2</b>     | 28     | Monocyte infiltration                           | Hs04420632_g1    | 95                        |
| <b>CD11C</b>    | 29     | Monocyte adhesion                               | Hs04194297_g1    | 104                       |
| <b>CD11B</b>    | 30     | Monocyte adhesion<br>and migration              | Hs01547656_m1    | 68                        |
| <b>BDNF</b>     | 31     | Neuroplasticity                                 | Hs00961622_m1    | 74                        |
| <b>IFITM2</b>   | 32     | interferon response<br>and antiviral            | Hs01555410_m1    | 91                        |
| <b>SLC24A4</b>  | 33     | cellular calcium ion<br>homeostasis             | HS00170103_m1    | 65                        |
| <b>CD206</b>    | 34     | Anti-inflammatory                               | Hs00198937_m1    | 75                        |
| <b>TSP1</b>     | 35     | Anti-inflammatory                               | Hs00957562_m1    | 67                        |
| <b>IGF1</b>     | 36     | Immune modulator                                | Hs05019740_g1    | 89                        |
| <b>INHBA</b>    | 37     | Immune modulator                                | Hs00610058_m1    | 61                        |
| <b>CCL19</b>    | 38     | Pro-inflammatory                                | Hs01549532_g1    | 119                       |
| <b>MMP9</b>     | 39     | Pro-inflammatory                                | Hs00542236_m1    | 58                        |
| <b>CCL17</b>    | 40     | Anti-inflammatory                               | Hs00598625_m1    | 96                        |
| <b>ACTB</b>     | 41     | Housekeeping                                    | Hs00998133_m1    | 57                        |
| <b>B2M</b>      | 42     | Housekeeping                                    | Hs01096678_m1    | 63                        |
| <b>GAPDH</b>    | 43     | Housekeeping                                    | Hs00152972_m1    | 89                        |
| <b>CD19</b>     | 44     | Control (neg.)                                  | Hs00174128_m1    | 80                        |
| <b>CD3</b>      | 45     | Control (neg.)                                  | Hs00218624_m1    | 80                        |
| <b>CD56</b>     | 46     | Control (neg.)                                  | Hs01041471_m1    | 71                        |
| <b>CD7</b>      | 47     | Control (neg.)                                  | Hs00559362_m1    | 57                        |
| <b>Xeno</b>     | 48     | Control (pos.)                                  | Cat. No. 4386995 | Cells-to-C<br>Control Kit |
