# Supplementary material for: Time-dependent changes in monocyte subsets and gene expression patterns are associated with long-term recovery in patients with ischemic stroke
Source: Research Square preprint supplement (doi:10.21203/rs.3.rs-8980124/v1), 2026-03-16
Supplement: Supplementary file 9 [file bdb9d090b1326ff0f3ab51f7.pdf]

## Metadata of patient

| <b>SampleID</b> | <b>Sex</b> | <b>Age</b> | <b>Stroke severity<br/>(Pairing for controls)</b> | <b>Recovery status<br/>(Pairing for controls)</b> |
|-----------------|------------|------------|---------------------------------------------------|---------------------------------------------------|
| <b>Ctr01</b>    | male       | 63         | Moderate                                          | No recovery                                       |
| <b>Ctr02</b>    | male       | 76         | Minor                                             | Recovery                                          |
| <b>Ctr03</b>    | male       | 72         | Moderate                                          | No recovery                                       |
| <b>Ctr04</b>    | male       | 72         | Moderate                                          | No recovery                                       |
| <b>Ctr05</b>    | female     | 72         | Minor                                             | No recovery                                       |
| <b>Ctr06</b>    | male       | 56         | Moderate                                          | Recovery                                          |
| <b>Ctr07</b>    | male       | 46         | Minor                                             | Recovery                                          |
| <b>Ctr08</b>    | male       | 54         | Moderate                                          | No recovery                                       |
| <b>Ctr09</b>    | male       | 82         | Moderate                                          | Recovery                                          |
| <b>Ctr10</b>    | female     | 72         | Moderate                                          | No recovery                                       |
| <b>Ctr11</b>    | female     | 72         | Minor                                             | No recovery                                       |
| <b>Ctr12</b>    | male       | 67         | Minor                                             | No recovery                                       |
| <b>Ctr13</b>    | male       | 43         | Minor                                             | No recovery                                       |
| <b>Ctr14</b>    | male       | 58         | Moderate                                          | No recovery                                       |
| <b>Ctr15</b>    | male       | 31         | Minor                                             | Recovery                                          |
| <b>Ctr16</b>    | female     | 62         | Minor                                             | Recovery                                          |
| <b>Ctr17</b>    | female     | 73         | Moderate                                          | Recovery                                          |
| <b>Ctr18</b>    | male       | 70         | Moderate                                          | Recovery                                          |
| <b>Ctr19</b>    | male       | 73         | Minor                                             | Recovery                                          |
| <b>Ctr20</b>    | female     | 65         | Minor                                             | No recovery                                       |
| <b>Ctr21</b>    | female     | 62         | Healthy                                           |                                                   |
| <b>Ctr22</b>    | male       | 73         | Minor                                             | Recovery                                          |
| <b>Ctr23</b>    | female     | 96         | Healthy                                           |                                                   |
| <b>Ctr24</b>    | male       | 56         | Moderate                                          | No recovery                                       |
| <b>Ctr25</b>    | female     | 56         | Moderate                                          | Recovery                                          |
| <b>Ctr26</b>    | male       | 73         | Minor                                             | No recovery                                       |
| <b>Ctr27</b>    | male       | 83         | Moderate                                          | No recovery                                       |
| <b>Ctr28</b>    | male       | 44         | Minor                                             | Recovery                                          |
| <b>Ctr29</b>    | female     | 67         | Moderate                                          | Recovery                                          |
| <b>Ctr30</b>    | female     | 43         | Healthy                                           |                                                   |
| <b>Ctr31</b>    | male       | 57         | Moderate                                          | Recovery                                          |
| <b>Ctr32</b>    | male       | 46         | Minor                                             | Recovery                                          |
| <b>Ctr33</b>    | male       | 28         | Healthy                                           |                                                   |
| <b>Ctr34</b>    | female     | 59         | Minor                                             | Recovery                                          |
| <b>Ctr35</b>    | male       | 64         | Minor                                             | Recovery                                          |
| <b>Ctr36</b>    | male       | 87         | Moderate                                          | No recovery                                       |
| <b>Ctr37</b>    | female     | 91         | Minor                                             | No recovery                                       |
| <b>Ctr38</b>    | female     | 90         | Moderate                                          | No recovery                                       |
| <b>Ctr39</b>    | female     | 98         | Healthy                                           |                                                   |
| <b>Ctr40</b>    | female     | 89         | Minor                                             | No recovery                                       |
| <b>Ctr41</b>    | female     | 84         | Minor                                             | No recovery                                       |
| <b>Ctr42</b>    | male       | 87         | Minor                                             | Recovery                                          |
| <b>Ctr43</b>    | male       | 84         | Moderate                                          | Recovery                                          |
| <b>Ctr44</b>    | female     | 58         | Healthy                                           |                                                   |

|                  |        |    |          |             |
|------------------|--------|----|----------|-------------|
| <b>Patient01</b> | female | 68 | Minor    | No recovery |
| <b>Patient02</b> | male   | 52 | Minor    | Recovery    |
| <b>Patient03</b> | female | 74 | Moderate | No recovery |
| <b>Patient04</b> | male   | 62 | Moderate | No recovery |
| <b>Patient05</b> | female | 57 | Moderate | Recovery    |
| <b>Patient06</b> | male   | 60 | Moderate | No recovery |
| <b>Patient07</b> | male   | 85 | Moderate | No recovery |
| <b>Patient08</b> | female | 83 | Minor    | No recovery |
| <b>Patient09</b> | male   | 71 | Moderate | Recovery    |
| <b>Patient10</b> | male   | 77 | Minor    | Recovery    |
| <b>Patient11</b> | male   | 58 | Moderate | No recovery |
| <b>Patient12</b> | male   | 80 | Minor    | No recovery |
| <b>Patient13</b> | female | 76 | Moderate | Recovery    |
| <b>Patient14</b> | male   | 81 | Moderate | Recovery    |
| <b>Patient16</b> | male   | 84 | Moderate | No recovery |
| <b>Patient17</b> | female | 63 | Minor    | Recovery    |
| <b>Patient18</b> | female | 74 | Minor    | No recovery |
| <b>Patient19</b> | female | 69 | Minor    | No recovery |
| <b>Patient20</b> | female | 67 | Moderate | Recovery    |
| <b>Patient21</b> | female | 80 | Minor    | No recovery |
| <b>Patient22</b> | male   | 56 | Minor    | Recovery    |
| <b>Patient23</b> | male   | 64 | Moderate | No recovery |
| <b>Patient24</b> | male   | 88 | Minor    | Recovery    |
| <b>Patient25</b> | male   | 60 | Moderate | Recovery    |
| <b>Patient26</b> | male   | 70 | Minor    | No recovery |
| <b>Patient27</b> | female | 82 | Minor    | No recovery |
| <b>Patient28</b> | male   | 75 | Moderate | No recovery |
| <b>Patient29</b> | male   | 48 | Minor    | No recovery |
| <b>Patient30</b> | male   | 75 | Moderate | No recovery |
| <b>Patient31</b> | female | 83 | Moderate | No recovery |
| <b>Patient32</b> | male   | 79 | Minor    | Recovery    |
| <b>Patient33</b> | male   | 51 | Minor    | Recovery    |
| <b>Patient34</b> | male   | 84 | Moderate | Recovery    |
| <b>Patient35</b> | male   | 76 | Minor    | Recovery    |
| <b>Patient36</b> | male   | 58 | Moderate | Recovery    |
| <b>Patient37</b> | male   | 65 | Minor    | Recovery    |
| <b>Patient40</b> | male   | 37 | Minor    | Recovery    |

Patients showing a decrease of 1 or more NIHSS points from baseline to the chronic phase (3 months and/or 1 year) were categorized as exhibiting neurological improvement (Recovery), whereas those with unchanged or increased NIHSS were categorized as having no neurological improvement (No Recovery).

Minor stroke = NIHSS 1-5 and Moderate stroke = NIHSS, 6-20
